# Supplementary material for: Safety, efficacy and immunogenicity of aerosolized Ad5-nCoV COVID-19 vaccine in a non-inferiority randomized controlled trial
Source: PubMed Central journal article supplement — NPJ Vaccines. 2024 Oct 31;9:209. doi: 10.1038/s41541-024-01003-x (PMC11527888; doi:10.1038/s41541-024-01003-x), 2024-10-31
Supplement: 41541_2024_1003_MOESM1_ESM.pdf [file 41541_2024_1003_MOESM1_ESM.pdf]

1 **SUPPLEMENTARY MATERIALS**

2 **Supplementary Figure**

3 Supplementary Figure 1: Cumulative risk of breakthrough Covid19 infection (14th day  
4 post-vaccination)

5 **Supplementary Tables**

6 Supplementary Table 1. GMC of S-RBD IgG antibodies (wild-type) (PPS)

7 Supplementary Table 2: GMC of S-RBD IgG antibodies (wild-type) (mITT)

8 Supplementary Table 3: Analysis of GMI of anti-spike RBD IgG antibodies (wild-type) (PPS)

9 Supplementary Table 4: Analysis of SCR of anti-spike RBD IgG antibodies (wild-type) (PPS)

10 Supplementary Table 5: Non-inferiority analysis of GMC and SCR of anti-spike RBD IgG  
11 antibodies (wild-type) (PPS)

12 Supplementary Table 6. GMT of neutralizing antibodies against Omicron Pseudovirus variants  
13 (BA.4/5) (PPS)

14 Supplementary Table 7: GMT of neutralizing antibodies against Omicron Pseudovirus variants  
15 (BA.4/5) (mITT)

16 Supplementary Table 8: Analysis of GMI of neutralizing antibodies against Omicron Pseudovirus  
17 variants (BA.4/5) (PPS)

18 Supplementary Table 9: Analysis of SCR of neutralizing antibodies against Omicron Pseudovirus  
19 variants (BA.4/5) (PPS)

20 Supplementary Table 10: Analysis of GMC of Salivary SIgA antibodies (PPS)

21 Supplementary Table 11: Analysis of GMI of saliva samples SIgA antibodies (PPS)

22 Supplementary Table 12: Summary of solicited and unsolicited AEs emerged in the 0 to 28 Days  
23 post booster vaccination by preferred term (PT) (SS)

24 Supplementary Table 13: Severity analysis of SAEs (SS)

25 Supplementary Table 14: Summary of SAEs by system organ class and preferred term (PT) (SS)

26 Supplementary Table 15: Stratified analysis of the efficacy of recombinant COVID-19 vaccine  
27 (Ad5-nCoV-IH) in preventing virologically confirmed COVID-19 cases

28 Supplementary Table 16: List of endpoint cases

29

30 **Supplementary Study Protocol**

31

32 **Supplementary CONSORT Checklist**

33 **Figure S1: Cumulative risk of breakthrough Covid19 infection (14th day post-vaccination)**

34

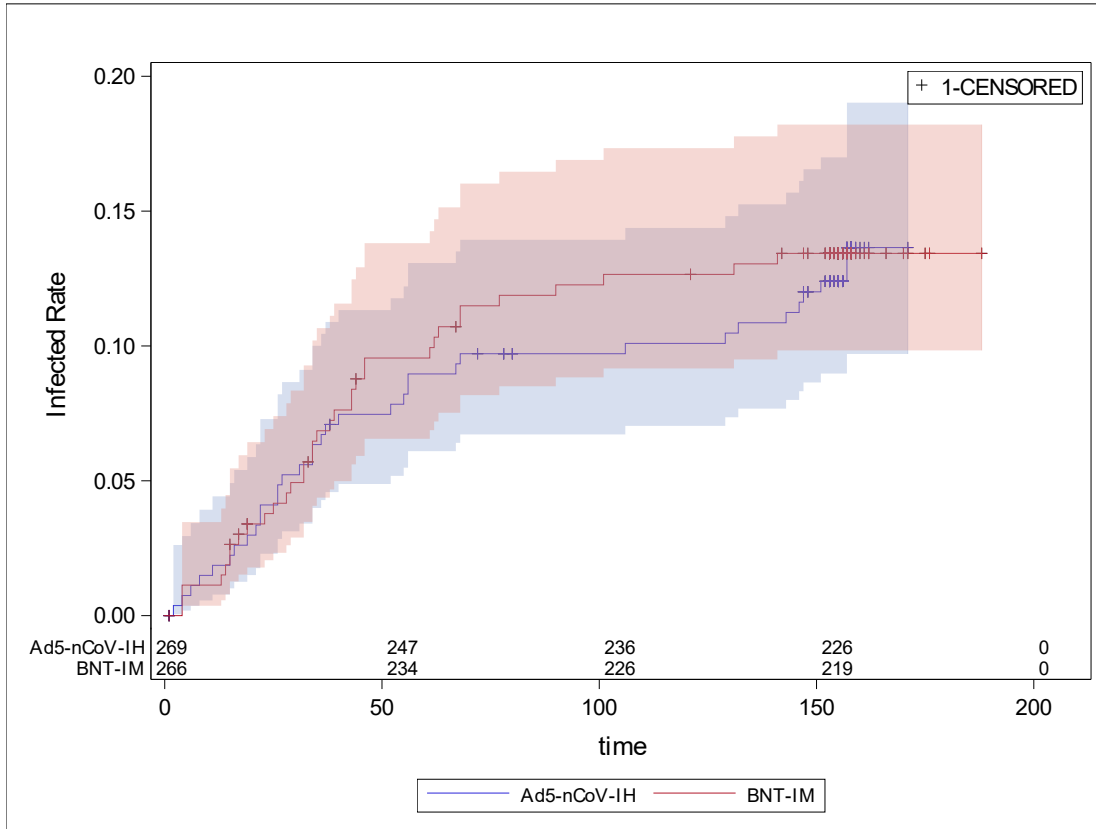

35

36 BNT-IM=Intramuscular tozinameran vaccine, Ad5-nCoV-IH = Recombinant Covid-19 Vaccine (Adenovirus  
37 Type 5 Vector) For Inhalation.

38 Endpoint cases were all RT-PCR/RTK confirmed and captured from Day 14 (excluding Day 14) after the  
39 second booster dose.

40 Supplementary Table 1. GMC of S-RBD IgG antibodies (wild-type) (PPS)

| Visit |          | Ad5-nCoV-IH<br>(N=270) | IM Pfizer mRNA<br>(N=268) | Total<br>(N=538)  | P-value |
|-------|----------|------------------------|---------------------------|-------------------|---------|
| D0    | n(miss)  | 270(0)                 | 268(0)                    | 538(0)            |         |
|       | Mean(SD) | 1273.454(3.1130)       | 1231.701(3.4052)          | 1252.481(3.2549)  | 0.7435  |
|       | Median   | 1335.587               | 1283.772                  | 1306.732          |         |
|       | Q1,Q3    | 572.000,2975.970       | 510.775,2930.177          | 563.250,2973.380  |         |
|       | Min,Max  | 27.79,16431.60         | 2.67,68418.90             | 2.67,68418.90     |         |
|       | 95%CI    | 1111.45,1459.07        | 1062.93,1427.27           | 1133.35,1384.13   |         |
| D14   | n(miss)  | 269(1)                 | 264(4)                    | 533(5)            |         |
|       | Mean(SD) | 1555.533(2.7581)       | 6975.264(2.0149)          | 3270.870(3.1617)  | <0.001  |
|       | Median   | 1472.420               | 7764.470                  | 3821.250          |         |
|       | Q1,Q3    | 669.970,3208.130       | 4639.911,10458.386        | 1431.400,8301.250 |         |
|       | Min,Max  | 57.48,20812.10         | 610.97,87662.50           | 57.48,87662.50    |         |
|       | 95%CI    | 1377.17,1757.00        | 6407.51,7593.33           | 2965.69,3607.46   |         |
| D28   | n(miss)  | 268(2)                 | 263(5)                    | 531(7)            |         |
|       | Mean(SD) | 1987.784(2.9583)       | 5260.365(2.1098)          | 3218.865(2.8616)  | <0.001  |
|       | Median   | 1923.369               | 5747.690                  | 3663.170          |         |
|       | Q1,Q3    | 851.587,4661.229       | 3123.080,8747.500         | 1456.920,7159.000 |         |
|       | Min,Max  | 98.13,35046.56         | 656.33,79109.80           | 98.13,79109.80    |         |
|       | 95%CI    | 1744.68,2264.76        | 4804.50,5759.48           | 2942.91,3520.69   |         |
| D84   | n(miss)  | 134(5)                 | 135(6)                    | 269(11)           |         |
|       | Mean(SD) | 1908.284(3.0792)       | 2591.097(2.3313)          | 2224.899(2.7311)  | 0.0124  |
|       | Median   | 1961.452               | 2496.670                  | 2226.230          |         |
|       | Q1,Q3    | 827.740,4344.680       | 1373.330,4579.350         | 1061.710,4476.130 |         |
|       | Min,Max  | 89.16,22455.74         | 387.42,37698.36           | 89.16,37698.36    |         |
|       | 95%CI    | 1574.65,2312.61        | 2243.41,2992.67           | 1972.11,2510.09   |         |
| D168  | n(miss)  | 126(13)                | 125(16)                   | 251(29)           |         |
|       | Mean(SD) | 1720.977(2.9406)       | 1725.299(2.3376)          | 1723.128(2.6358)  | 0.9837  |
|       | Median   | 1842.432               | 1815.740                  | 1815.740          |         |
|       | Q1,Q3    | 822.770,3781.050       | 975.930,2900.490          | 915.270,3243.640  |         |
|       | Min,Max  | 47.38,17047.27         | 200.98,16821.82           | 47.38,17047.27    |         |
|       | 95%CI    | 1422.93,2081.45        | 1484.50,2005.16           | 1527.54,1943.76   |         |

41 N= the number of subjects in each data set, Ad5-nCov-IH=Recombinant Covid-19 Vaccine (Adenovirus Type  
42 5 Vector) For Inhalation, BNT-IM= intramuscular tozinameran vaccine.

43 Supplementary Table 2: GMC of S-RBD IgG antibodies (wild-type) (mITT)

| Visit |          | Ad5-nCoV-IH<br>(N=270) | IM Pfizer mRNA<br>(N=269) | Total<br>(N=539)  | P-value |
|-------|----------|------------------------|---------------------------|-------------------|---------|
| D0    | n(miss)  | 270(0)                 | 269(0)                    | 539(0)            | 0.7830  |
|       | Mean(SD) | 1273.454(3.1130)       | 1238.233(3.4079)          | 1255.752(3.2563)  |         |
|       | Median   | 1335.587               | 1288.230                  | 1311.380          |         |
|       | Q1,Q3    | 572.000,2975.970       | 520.480,2934.060          | 563.250,2975.970  |         |
|       | Min,Max  | 27.79,16431.60         | 2.67,68418.90             | 2.67,68418.90     |         |
|       | 95%CI    | 1111.45,1459.07        | 1068.76,1434.57           | 1136.37,1387.67   |         |
| D14   | n(miss)  | 269(1)                 | 265(4)                    | 534(5)            | <0.001  |
|       | Mean(SD) | 1555.533(2.7581)       | 6972.188(2.0123)          | 3274.795(3.1594)  |         |
|       | Median   | 1472.420               | 7741.270                  | 3828.468          |         |
|       | Q1,Q3    | 669.970,3208.130       | 4674.600,10415.410        | 1431.400,8301.250 |         |
|       | Min,Max  | 57.48,20812.10         | 610.97,87662.50           | 57.48,87662.50    |         |
|       | 95%CI    | 1377.17,1757.00        | 6406.72,7587.57           | 2969.71,3611.23   |         |
| D28   | n(miss)  | 268(2)                 | 264(5)                    | 532(7)            | <0.001  |
|       | Mean(SD) | 1987.784(2.9583)       | 5261.316(2.1068)          | 3222.127(2.8595)  |         |
|       | Median   | 1923.369               | 5745.385                  | 3671.575          |         |
|       | Q1,Q3    | 851.587,4661.229       | 3127.342,8736.123         | 1459.997,7155.904 |         |
|       | Min,Max  | 98.13,35046.56         | 656.33,79109.80           | 98.13,79109.80    |         |
|       | 95%CI    | 1744.68,2264.76        | 4807.03,5758.54           | 2946.33,3523.74   |         |
| D84   | n(miss)  | 134(5)                 | 135(6)                    | 269(11)           | 0.0124  |
|       | Mean(SD) | 1908.284(3.0792)       | 2591.097(2.3313)          | 2224.899(2.7311)  |         |
|       | Median   | 1961.452               | 2496.670                  | 2226.230          |         |
|       | Q1,Q3    | 827.740,4344.680       | 1373.330,4579.350         | 1061.710,4476.130 |         |
|       | Min,Max  | 89.16,22455.74         | 387.42,37698.36           | 89.16,37698.36    |         |
|       | 95%CI    | 1574.65,2312.61        | 2243.41,2992.67           | 1972.11,2510.09   |         |
| D168  | n(miss)  | 126(13)                | 125(16)                   | 251(29)           | 0.9837  |
|       | Mean(SD) | 1720.977(2.9406)       | 1725.299(2.3376)          | 1723.128(2.6358)  |         |
|       | Median   | 1842.432               | 1815.740                  | 1815.740          |         |
|       | Q1,Q3    | 822.770,3781.050       | 975.930,2900.490          | 915.270,3243.640  |         |
|       | Min,Max  | 47.38,17047.27         | 200.98,16821.82           | 47.38,17047.27    |         |
|       | 95%CI    | 1422.93,2081.45        | 1484.50,2005.16           | 1527.54,1943.76   |         |

44 N= the number of subjects in each data set, Ad5-nCov-IH=Recombinant Covid-19 Vaccine (Adenovirus Type  
45 5 Vector) For Inhalation, BNT-IM= intramuscular tozinameran vaccine.

46 Supplementary Table 3: Analysis of GMI of anti-spike RBD IgG antibodies (wild-type) (PPS)

| Visit |          | Ad5-nCov-IH | BNT-IM      | Total       | P value |
|-------|----------|-------------|-------------|-------------|---------|
| D14   | n(miss)  | 269(1)      | 264(4)      | 533(5)      |         |
|       | Mean(SD) | 1.23(2.09)  | 5.74(2.74)  | 2.64(3.23)  | <0.0001 |
|       | Median   | 1.04        | 4.77        | 2.11        |         |
|       | Q1,Q3    | 0.78,1.58   | 2.78,9.67   | 1.01,5.05   |         |
|       | Min,Max  | 0.36,67.83  | 0.72,259.86 | 0.36,259.86 |         |
|       | 95%CI    | 1.12,1.34   | 5.08,6.49   | 2.39,2.91   |         |
| D28   | n(miss)  | 268(2)      | 263(5)      | 531(7)      |         |
|       | Mean(SD) | 1.57(2.71)  | 4.23 (2.66) | 2.56 (3.02) | <0.0001 |
|       | Median   | 1.24        | 3.57        | 2.12        |         |
|       | Q1,Q3    | 0.80,2.32   | 2.05,7.03   | 1.20,4.56   |         |
|       | Min,Max  | 0.32,90.95  | 0.56,245.82 | 0.32,245.82 |         |
|       | 95%CI    | 1.39,1.77   | 3.76,4.77   | 2.33,2.82   |         |
| D84   | n(miss)  | 134(5)      | 135(6)      | 269(11)     |         |
|       | Mean(SD) | 1.82(3.07)  | 2.37(2.76)  | 2.06(2.93)  | 0.0465  |
|       | Median   | 1.33        | 1.95        | 1.68        |         |
|       | Q1,Q3    | 0.82,3.32   | 1.15,4.00   | 0.99,3.72   |         |
|       | Min,Max  | 0.36,73.73  | 0.26,212.38 | 0.26,212.38 |         |
|       | 95%CI    | 1.50,2.21   | 1.99,2.81   | 1.83,2.36   |         |
| D168  | n(miss)  | 126(13)     | 125(16)     | 251(29)     |         |
|       | Mean(SD) | 1.58(2.95)  | 1.541(2.90) | 1.56 (2.92) | 0.8483  |
|       | Median   | 1.40        | 1.21        | 1.26        |         |
|       | Q1,Q3    | 0.73,2.60   | 0.71,2.76   | 0.71,2.68   |         |
|       | Min,Max  | 0.27,39.35  | 0.17,106.28 | 0.17,106.28 |         |
|       | 95%CI    | 1.31,1.91   | 1.28,1.86   | 1.37,1.78   |         |

47 n=actual number of subjects in each row, Ad5-nCov-IH=Recombinant Covid-19 Vaccine (Adenovirus Type  
48 5 Vector) For Inhalation, BNT-IM = intramuscular tozinameran vaccine

49 The antibody concentration of each subject was log transformed before statistical description. The t-test  
50 was used for inter-group comparison. The analysis of D14 (Day 14) and D28 (Day 28) is based on primary  
51 immunogenicity group, and D84 (Day 84) and D168 (Day 168) based on persistent immunogenicity group  
52 which was defined as last 140 subjects in each arm per protocol 3.1 (10 Jan 2023).

53 Supplementary Table 4: Analysis of SCR of anti-spike RBD IgG antibodies (wild-type) (PPS)

|      | Group                | N   | Positive | SCR (95% CI)           | P value |
|------|----------------------|-----|----------|------------------------|---------|
| D14  | Ad5-nCov-IH          | 269 | 46       | 17.10(12.80,22.14)     | <0.0001 |
|      | BNT-IM               | 264 | 235      | 89.02(84.61,92.52)     |         |
|      | Ad5-nCov-IH-BNT-IM   |     |          | -71.91(-77.79, -66.04) |         |
| D28  | Ad5-nCov-IH          | 268 | 74       | 27.61(22.35,33.38)     | <0.0001 |
|      | BNT-IM               | 263 | 203      | 77.19(71.63,82.12)     |         |
|      | Ad5-nCov-IH-BNT-IM   |     |          | -49.57(-56.95, -42.2)  |         |
| D84  | Ad5-nCov-IH          | 134 | 46       | 34.33(26.35,43.02)     | 0.015   |
|      | BNT-IM               | 135 | 66       | 48.89(40.19,57.63)     |         |
|      | Ad5-nCov-IH - BNT-IM |     |          | -14.56(-26.21, -2.91)  |         |
| D168 | Ad5-nCov-IH          | 126 | 45       | 35.71(27.38,44.74)     | 0.371   |
|      | BNT-IM               | 125 | 38       | 30.40(22.49,39.26)     |         |
|      | Ad5-nCov-IH - BNT-IM |     |          | 5.31(-6.31,16.93)      |         |

54 N= the number of subjects in each data set, SCR=seroconversion rate, Ad5-nCov-IH=Recombinant Covid-  
55 19 Vaccine (Adenovirus Type 5 Vector) For Inhalation, BNT-IM= intramuscular tozinameran vaccine.

56 The chi-square test or Fisher's exact test was used for inter-group comparison. The analysis of D14 (Day 14)  
57 and D28 (Day 28) is based on primary immunogenicity group, and D84 (Day 84) and D168 (Day 168) based  
58 on persistent immunogenicity group which was defined as last 140 subjects in each arm per protocol 3.1 (10  
59 Jan 2023).

60 Supplementary Table 5: Non-inferiority analysis of GMC and SCR of anti-spike RBD IgG  
 61 antibodies (wild-type) (PPS)

| <b>Non-inferiority analysis of GMC of anti-spike RBD IgG antibodies at Day 14 post vaccination</b> |          |                 |                        |         |
|----------------------------------------------------------------------------------------------------|----------|-----------------|------------------------|---------|
|                                                                                                    | Estimate | 97.5% CI        | Non-inferiority margin | Outcome |
| Ad5-nCoV-IH (N=269)                                                                                | 1555.53  | 1353.09,1788.27 |                        |         |
| BNT-IM (N=264)                                                                                     | 6972.19  | 6328.69,7681.12 |                        |         |
| Ad5-nCoV-IH/BNT-IM                                                                                 | 0.22     | 0.19,0.26       | 0.67                   | No      |

  

| <b>Non-inferiority analysis of SCR of anti-spike RBD IgG antibodies at Day 14 post vaccination</b> |          |                        |                        |         |
|----------------------------------------------------------------------------------------------------|----------|------------------------|------------------------|---------|
|                                                                                                    | Positive | SCR (97.5% CI)         | Non-inferiority margin | Outcome |
| Ad5-nCoV-IH (N=269)                                                                                | 46       | 17.10(12.26,22.88)     |                        |         |
| BNT-IM (N=264)                                                                                     | 235      | 89.02(83.95,92.94)     |                        |         |
| Ad5-nCoV-IH-BNT-IM                                                                                 |          | -71.91(-78.63, -71.91) | -10%                   | No      |

62 N=number of participants in each data set, GMC=geometric mean concentration, SCR=seroconversion rate,  
 63 anti-spike RBD IgG=anti-spike receptor-binding domain immunoglobulin G, Ad5-nCoV-IH= Recombinant  
 64 Covid-19 Vaccine (Adenovirus Type 5 Vector) For Inhalation, BNT-IM= intramuscular tozinameran vaccine.

65 Log-transformed antibody levels were analyzed with the use of an analysis of covariance (ANCOVA) model,  
 66 with the study vaccine as a fixed effect and with adjustment for age groups (<65 or >=65 years) and pre-  
 67 booster titers. With the test level  $\alpha = 0.025$  (two-sided), when the lower limit of 97.5% CI for the GMC ratio  
 68 ( $GMC_{Ad5-nCoV-IH} / GMC_{BNT-IM}$ ) of the anti-spike RBD IgG antibodies (wild-type) was greater than 0.67 after  
 69 14 days of vaccination, the non-inferiority hypothesis was considered true. With the test level two-side  $\alpha =$   
 70 0.025 (two-sided), when the lower limit of 97.5% CI for the SCR difference ( $SCR_{Ad5-nCoV-IH} - SCR_{BNT-IM}$ ) of  
 71 the anti-spike RBD IgG antibodies (wild-type) was greater than -10% after 14 days of vaccination, the non-  
 72 inferiority hypothesis was considered true.

73 Supplementary Table 6. GMT of neutralizing antibodies against Omicron Pseudovirus variants  
 74 (BA.4/5) (mITT)

| Visit |          | Ad5-nCoV-IH<br>(N=270) | IM Pfizer mRNA<br>(N=269) | Total<br>(N=539) | P-value |
|-------|----------|------------------------|---------------------------|------------------|---------|
| D0    | n(miss)  | 270(0)                 | 269(0)                    | 539(0)           | 0.3369  |
|       | Mean(SD) | 286.92(3.760)          | 320.82(3.947)             | 303.37(3.853)    |         |
|       | Median   | 301.45                 | 325.00                    | 314.00           |         |
|       | Q1,Q3    | 124.00,700.00          | 145.00,861.00             | 132.00,751.00    |         |
|       | Min,Max  | 15.0,30882.0           | 15.0,45953.0              | 15.0,45953.0     |         |
|       | 95%CI    | 244.82,336.26          | 272.07,378.31             | 270.65,340.04    |         |
| D14   | n(miss)  | 269(1)                 | 265(4)                    | 534(5)           | <0.001  |
|       | Mean(SD) | 395.3(3.45)            | 1338.1(2.46)              | 723.9(3.47)      |         |
|       | Median   | 423.0                  | 1348.0                    | 880.5            |         |
|       | Q1,Q3    | 172.0,895.0            | 874.0,2106.0              | 349.0,1564.0     |         |
|       | Min,Max  | 15,184705              | 58,218151                 | 15,218151        |         |
|       | 95%CI    | 340.64,458.62          | 1200.03,1492.16           | 651.33,804.65    |         |
| D28   | n(miss)  | 268(2)                 | 264(5)                    | 532(7)           | <0.001  |
|       | Mean(SD) | 563.81(3.631)          | 1242.00(2.544)            | 834.33(3.298)    |         |
|       | Median   | 615.00                 | 1252.40                   | 951.49           |         |
|       | Q1,Q3    | 234.00,1396.00         | 643.99,2329.94            | 409.98,1756.99   |         |
|       | Min,Max  | 15.0,434182.0          | 114.0,586897.0            | 15.0,586897.0    |         |
|       | 95%CI    | 482.81,658.40          | 1109.11,1390.82           | 753.69,923.59    |         |
| D84   | n(miss)  | 134(5)                 | 135(6)                    | 269(11)          | 0.0798  |
|       | Mean(SD) | 574.9(3.80)            | 752.8(3.23)               | 658.2(3.53)      |         |
|       | Median   | 623.9                  | 785.0                     | 719.0            |         |
|       | Q1,Q3    | 226.0,1526.0           | 385.0,1480.0              | 295.0,1503.0     |         |
|       | Min,Max  | 15,36852               | 15,223606                 | 15,223606        |         |
|       | 95%CI    | 457.54,722.31          | 616.45,919.24             | 565.64,765.83    |         |
| D168  | n(miss)  | 126(13)                | 125(16)                   | 251(29)          | 0.2979  |
|       | Mean(SD) | 285.9(3.36)            | 335.9(3.45)               | 309.8(3.40)      |         |
|       | Median   | 307.5                  | 333.0                     | 322.0            |         |
|       | Q1,Q3    | 119.0,605.0            | 153.0,710.0               | 138.0,678.0      |         |
|       | Min,Max  | 15,21829               | 15,458709                 | 15,458709        |         |
|       | 95%CI    | 230.83,353.99          | 269.81,418.15             | 266.00,360.73    |         |

75 N= the number of subjects in each data set, Ad5-nCov-IH=Recombinant Covid-19 Vaccine (Adenovirus Type  
 76 5 Vector) For Inhalation, BNT-IM= intramuscular tozinameran vaccine.



77 Supplementary Table 7: GMT of neutralizing antibodies against Omicron Pseudovirus variants  
 78 (BA.4/5) (PPS)

| Visit |          | Ad5-nCoV-IH<br>(N=270) | IM Pfizer mRNA<br>(N=268) | Total<br>(N=538) | P-value |
|-------|----------|------------------------|---------------------------|------------------|---------|
| D0    | n(miss)  | 270(0)                 | 268(0)                    | 538(0)           | 0.3573  |
|       | Mean(SD) | 286.92(3.760)          | 319.38(3.950)             | 302.65(3.853)    |         |
|       | Median   | 301.45                 | 322.49                    | 313.00           |         |
|       | Q1,Q3    | 124.00,700.00          | 145.00,854.98             | 132.00,751.00    |         |
|       | Min,Max  | 15.0,30882.0           | 15.0,45953.0              | 15.0,45953.0     |         |
|       | 95%CI    | 244.82,336.26          | 270.75,376.75             | 269.98,339.28    |         |
| D14   | n(miss)  | 269(1)                 | 264(4)                    | 533(5)           | <0.001  |
|       | Mean(SD) | 395.3(3.45)            | 1338.8(2.47)              | 723.3(3.47)      |         |
|       | Median   | 423.0                  | 1349.0                    | 877.0            |         |
|       | Q1,Q3    | 172.0,895.0            | 873.5,2128.9              | 349.0,1564.0     |         |
|       | Min,Max  | 15,184705              | 58,218151                 | 15,218151        |         |
|       | 95%CI    | 340.64,458.62          | 1200.13,1493.50           | 650.62,804.06    |         |
| D28   | n(miss)  | 268(2)                 | 263(5)                    | 531(7)           | <0.001  |
|       | Mean(SD) | 563.81(3.631)          | 1240.68(2.548)            | 833.26(3.301)    |         |
|       | Median   | 615.00                 | 1237.00                   | 948.00           |         |
|       | Q1,Q3    | 234.00,1396.00         | 640.00,2430.00            | 406.00,1764.00   |         |
|       | Min,Max  | 15.0,434182.0          | 114.0,586897.0            | 15.0,586897.0    |         |
|       | 95%CI    | 482.81,658.40          | 1107.47,1389.91           | 752.61,922.56    |         |
| D84   | n(miss)  | 134(5)                 | 135(6)                    | 269(11)          | 0.0798  |
|       | Mean(SD) | 574.9(3.80)            | 752.8(3.23)               | 658.2(3.53)      |         |
|       | Median   | 623.9                  | 785.0                     | 719.0            |         |
|       | Q1,Q3    | 226.0,1526.0           | 385.0,1480.0              | 295.0,1503.0     |         |
|       | Min,Max  | 15,36852               | 15,223606                 | 15,223606        |         |
|       | 95%CI    | 457.54,722.31          | 616.45,919.24             | 565.64,765.83    |         |
| D168  | n(miss)  | 126(13)                | 125(16)                   | 251(29)          | 0.2979  |
|       | Mean(SD) | 285.9(3.36)            | 335.9(3.45)               | 309.8(3.40)      |         |
|       | Median   | 307.5                  | 333.0                     | 322.0            |         |
|       | Q1,Q3    | 119.0,605.0            | 153.0,710.0               | 138.0,678.0      |         |
|       | Min,Max  | 15,21829               | 15,458709                 | 15,458709        |         |
|       | 95%CI    | 230.83,353.99          | 269.81,418.15             | 266.00,360.73    |         |

79 N= the number of subjects in each data set, Ad5-nCov-IH=Recombinant Covid-19 Vaccine (Adenovirus Type  
 80 5 Vector) For Inhalation, BNT-IM= intramuscular tozinameran vaccine.

81 Supplementary Table 8: Analysis of GMI of neutralizing antibodies against Omicron Pseudovirus  
 82 variants (BA.4/5) (PPS)

| Visit |          | Ad5-nCov-IH<br>(N=270) | BNT-IM<br>(N=268) | Total<br>(N=538) | <i>P</i> value |
|-------|----------|------------------------|-------------------|------------------|----------------|
| D14   | n(miss)  | 269(1)                 | 264(4)            | 533(5)           |                |
|       | Mean(SD) | 1.39(2.649)            | 4.28(2.83)        | 2.42(3.17)       | <0.0001        |
|       | Median   | 1.11                   | 4.36              | 2.18             |                |
|       | Q1,Q3    | 0.74,2.22              | 2.16,7.69         | 1.00,5.27        |                |
|       | Min,Max  | 0.24,176.60            | 0.17,98.07        | 0.17,176.60      |                |
|       | 95%CI    | 1.23,1.56              | 3.77,4.86         | 2.20,2.67        |                |
| D28   | n(miss)  | 268(2)                 | 263(5)            | 531(7)           |                |
|       | Mean(SD) | 1.97(3.14)             | 3.82(2.83)        | 2.73(3.14)       | <0.0001        |
|       | Median   | 1.66                   | 3.68              | 2.45             |                |
|       | Q1,Q3    | 0.70,3.52              | 1.82,7.60         | 1.26,5.79        |                |
|       | Min,Max  | 0.25,89.80             | 0.13,243.93       | 0.13,243.93      |                |
|       | 95%CI    | 1.71,2.26              | 3.36,4.33         | 2.48,3.01        |                |
| D84   | n(miss)  | 134(5)                 | 135(6)            | 269(11)          |                |
|       | Mean(SD) | 2.26(3.48)             | 2.46 (3.01)       | 2.36(3.24)       | 0.5636         |
|       | Median   | 1.86                   | 2.16              | 2.07             |                |
|       | Q1,Q3    | 0.84,5.12              | 1.09,4.93         | 1.00,4.93        |                |
|       | Min,Max  | 0.29,111.20            | 0.19,48.41        | 0.19,111.20      |                |
|       | 95%CI    | 1.83,2.80              | 2.04,2.97         | 2.05,2.72        |                |
| D168  | n(miss)  | 126(13)                | 125(16)           | 251(29)          |                |
|       | Mean(SD) | 1.13(3.25)             | 1.08 (3.86)       | 1.11(3.54)       | 0.8013         |
|       | Median   | 0.92                   | 0.82              | 0.89             |                |
|       | Q1,Q3    | 0.52,2.34              | 0.45,2.44         | 0.47,2.38        |                |
|       | Min,Max  | 0.11,19.93             | 0.02,37.93        | 0.02,37.93       |                |
|       | 95%CI    | 0.92,1.39              | 0.85,1.38         | 0.95,1.29        |                |

83 n=actual number of subjects in each row, Ad5-nCov-IH=Recombinant Covid-19 Vaccine (Adenovirus Type  
 84 5 Vector) For Inhalation, BNT-IM= intramuscular tozinameran vaccine.

85 The antibody concentration of each subject was log transformed before statistical description. The t-test was  
 86 used for inter-group comparison. The analysis of D14 (Day 14) and D28 (Day 28) is based on primary  
 87 immunogenicity group, and D84 (Day 84) and D168 (Day 168) based on persistent immunogenicity group  
 88 which was defined as last 140 subjects in each arm per protocol 3.1 (10 Jan 2023).

89 Supplementary Table 9: Analysis of SCR of neutralizing antibodies against Omicron Pseudovirus  
 90 variants (BA.4/5) (PPS)

|      | <b>Group</b>         | <b>N</b> | <b>Positive</b> | <b>SCR (95% CI)</b>   | <b>P value</b> |
|------|----------------------|----------|-----------------|-----------------------|----------------|
| D14  | Ad5-nCov-IH          | 269      | 31              | 11.52(7.97,15.96)     | <0.0001        |
|      | BNT-IM               | 264      | 140             | 53.03(46.82,59.18)    |                |
|      | Ad5-nCov-IH - BNT-IM |          |                 | -41.51(-48.63,-34.38) |                |
| D28  | Ad5-nCov-IH          | 268      | 56              | 20.90(16.19,26.26)    | <0.0001        |
|      | BNT-IM               | 263      | 123             | 46.77(40.61,53.00)    |                |
|      | Ad5-nCov-IH - BNT-IM |          |                 | -25.87(-33.62,-18.12) |                |
| D84  | Ad5-nCov-IH          | 134      | 38              | 28.36(20.91,36.79)    | 0.969          |
|      | BNT-IM               | 135      | 38              | 28.15(20.75,36.53)    |                |
|      | Ad5-nCov-IH - BNT-IM |          |                 | 0.21(-10.55,10.97)    |                |
| D168 | Ad5-nCov-IH          | 126      | 18              | 14.29(8.69,21.63)     | 0.297          |
|      | BNT-IM               | 125      | 24              | 19.20(12.71,27.21)    |                |
|      | Ad5-nCov-IH - BNT-IM |          |                 | -4.91(-14.13,4.31)    |                |

91 N=the number of subjects in each data set, Ad5-nCov-IH=Recombinant Covid-19 Vaccine (Adenovirus Type  
 92 5 Vector) For Inhalation, BNT-IM= intramuscular tozinameran vaccine.

93 The chi-square test or Fisher's exact test was used for inter-group comparison. The analysis of D14 (Day 14)  
 94 and D28 (Day 28) is based on primary immunogenicity group, and D84 (Day 84) and D168 (Day 168) based  
 95 on persistent immunogenicity group which was defined as last 140 subjects in each arm per protocol 3.1 (10  
 96 Jan 2023).

| Assay              | Visit    |                | Ad5-nCov-IH<br>(N=270) | BNT-1M<br>(N=268) | Total<br>(N=538) | P-value |
|--------------------|----------|----------------|------------------------|-------------------|------------------|---------|
| B.1.1.529-<br>BA.1 | D0 (V1)  | n(miss)        | 42(228)                | 39(229)           | 81(457)          |         |
|                    |          | Mean(SD)       | 17.594(2.3195)         | 19.617(2.4308)    | 18.541(2.3645)   | 0.5727  |
|                    |          | Median         | 16.039                 | 21.471            | 20.440           |         |
|                    |          | Q1,Q3          | 9.880,32.994           | 10.967,39.025     | 10.967,33.740    |         |
|                    |          | Min,Max        | 1.07,76.99             | 2.35,102.74       | 1.07,102.74      |         |
|                    | D14 (V3) | 95%CI          | 13.54,22.87            | 14.71,26.16       | 15.33,22.43      |         |
|                    |          | n(miss)        | 42(228)                | 39(229)           | 81(457)          |         |
|                    |          | Mean(SD)       | 24.163(2.7924)         | 23.875(2.3747)    | 24.024(2.5766)   | 0.9549  |
|                    |          | Median         | 23.269                 | 21.737            | 22.011           |         |
|                    |          | Q1,Q3          | 9.984,60.569           | 13.161,39.945     | 12.069,45.247    |         |
|                    | D28 (V4) | Min,Max        | 4.43,235.23            | 3.38,168.74       | 3.38,235.23      |         |
|                    |          | 95%CI          | 17.55,33.28            | 18.04,31.60       | 19.49,29.62      |         |
|                    |          | n(miss)        | 42(228)                | 39(229)           | 81(457)          |         |
|                    |          | Mean(SD)       | 25.443(3.4096)         | 17.716(2.1263)    | 21.374(2.8196)   | 0.1115  |
|                    |          | Median         | 17.832                 | 19.948            | 19.598           |         |
|                    | D84 (V5) | Q1,Q3          | 11.078,62.352          | 9.223,29.101      | 10.988,40.208    |         |
|                    |          | Min,Max        | 1.70,708.98            | 1.95,58.85        | 1.70,708.98      |         |
|                    |          | 95%CI          | 17.36,37.29            | 13.87,22.62       | 17.00,26.88      |         |
|                    |          | n(miss)        | 42(228)                | 39(229)           | 81(457)          |         |
|                    |          | Mean(SD)       | 17.914(2.8006)         | 15.373(2.3598)    | 16.642(2.5818)   | 0.4719  |
| BA.2.75            | D0 (V1)  | Median         | 13.715                 | 14.131            | 13.783           |         |
|                    |          | Q1,Q3          | 9.171,34.887           | 7.936,28.741      | 9.099,31.896     |         |
|                    |          | Min,Max        | 3.40,169.74            | 3.01,91.24        | 3.01,169.74      |         |
|                    |          | 95%CI          | 13.00,24.69            | 11.64,20.31       | 13.49,20.53      |         |
|                    |          | n(miss)        | 42(228)                | 39(229)           | 81(457)          |         |
|                    | D14 (V3) | Mean(SD)       | 20.620(2.5382)         | 20.636(2.6663)    | 20.628(2.5843)   | 0.9971  |
|                    |          | Median         | 18.869                 | 22.671            | 22.596           |         |
|                    |          | Q1,Q3          | 11.702,42.654          | 11.916,46.344     | 11.916,42.654    |         |
|                    |          | Min,Max        | 0.89,111.77            | 1.96,114.47       | 0.89,114.47      |         |
|                    |          | 95%CI          | 15.43,27.56            | 15.02,28.36       | 16.72,25.45      |         |
|                    | D28 (V4) | n(miss)        | 42(228)                | 39(229)           | 81(457)          |         |
|                    |          | Mean(SD)       | 29.097(2.7342)         | 25.742(2.5127)    | 27.431(2.6170)   | 0.5702  |
|                    |          | Median         | 27.619                 | 23.335            | 24.415           |         |
|                    |          | Q1,Q3          | 12.172,60.518          | 13.490,45.657     | 12.766,51.673    |         |
|                    |          | Min,Max        | 5.31,311.70            | 3.20,179.42       | 3.20,311.70      |         |
|                    | D84 (V5) | 95%CI          | 21.27,39.81            | 19.10,34.70       | 22.17,33.93      |         |
|                    |          | n(miss)        | 42(228)                | 39(229)           | 81(457)          |         |
|                    |          | Mean(SD)       | 32.072(3.5405)         | 19.217(2.3894)    | 25.063(3.0532)   | 0.0361  |
|                    |          | Median         | 25.587                 | 21.604            | 22.836           |         |
|                    |          | Q1,Q3          | 14.317,85.872          | 10.151,37.402     | 12.819,45.197    |         |
| D84 (V5)           | Min,Max  | 0.98,940.08    | 1.54,98.99             | 0.98,940.08       |                  |         |
|                    | 95%CI    | 21.63,47.56    | 14.49,25.49            | 19.58,32.08       |                  |         |
|                    | n(miss)  | 42(228)        | 39(229)                | 81(457)           |                  |         |
|                    | Mean(SD) | 20.408(2.9348) | 16.014(2.5435)         | 18.159(2.7494)    | 0.2839           |         |
|                    | Median   | 19.134         | 15.871                 | 17.578            |                  |         |
| D84 (V5)           | Q1,Q3    | 8.171,46.821   | 9.203,26.508           | 9.203,43.146      |                  |         |
|                    | Min,Max  | 2.67,188.50    | 3.08,94.66             | 2.67,188.50       |                  |         |
|                    | 95%CI    | 14.59,28.54    | 11.83,21.67            | 14.52,22.71       |                  |         |

| Assay     | Visit    |                | Ad5-nCov-IH<br>(N=270) | BNT-1M<br>(N=268) | Total<br>(N=538) | P-value |
|-----------|----------|----------------|------------------------|-------------------|------------------|---------|
| BA.2.75.2 | D0 (V1)  | n(miss)        | 42(228)                | 39(229)           | 81(457)          |         |
|           |          | Mean(SD)       | 25.671(2.5656)         | 25.643(2.6540)    | 25.657(2.5925)   | 0.9959  |
|           |          | Median         | 27.552                 | 26.274            | 27.468           |         |
|           |          | Q1,Q3          | 13.917,44.446          | 15.391,51.210     | 14.044,44.446    |         |
|           |          | Min,Max        | 1.03,322.84            | 2.90,202.90       | 1.03,322.84      |         |
|           | D14 (V3) | 95%CI          | 19.14,34.43            | 18.69,35.19       | 20.78,31.67      |         |
|           |          | n(miss)        | 42(228)                | 39(229)           | 81(457)          |         |
|           |          | Mean(SD)       | 34.703(2.6137)         | 30.191(2.6077)    | 32.452(2.6019)   | 0.5159  |
|           |          | Median         | 33.066                 | 28.237            | 31.656           |         |
|           |          | Q1,Q3          | 16.506,69.943          | 14.770,49.471     | 16.493,60.964    |         |
|           | D28 (V4) | Min,Max        | 6.29,399.07            | 4.14,306.70       | 4.14,399.07      |         |
|           |          | 95%CI          | 25.72,46.82            | 22.13,41.19       | 26.27,40.09      |         |
|           |          | n(miss)        | 42(228)                | 39(229)           | 81(457)          |         |
|           |          | Mean(SD)       | 37.085(3.5172)         | 22.696(2.4452)    | 29.277(3.0606)   | 0.0453  |
|           |          | Median         | 28.596                 | 25.842            | 27.939           |         |
|           | D84 (V5) | Q1,Q3          | 17.937,79.661          | 11.862,39.604     | 15.409,53.996    |         |
|           |          | Min,Max        | 1.20,1275.23           | 2.93,118.67       | 1.20,1275.23     |         |
|           |          | 95%CI          | 25.06,54.88            | 16.99,30.33       | 22.86,37.49      |         |
|           |          | n(miss)        | 42(228)                | 39(229)           | 81(457)          |         |
|           |          | Mean(SD)       | 23.872(2.8227)         | 20.614(2.6254)    | 22.243(2.7181)   | 0.5126  |
| BA.4.6    | D0 (V1)  | Median         | 20.514                 | 16.984            | 19.175           |         |
|           |          | Q1,Q3          | 10.643,50.011          | 12.125,37.035     | 11.096,44.897    |         |
|           |          | Min,Max        | 4.24,262.19            | 3.42,203.16       | 3.42,262.19      |         |
|           |          | 95%CI          | 17.28,32.99            | 15.08,28.19       | 17.83,27.75      |         |
|           |          | n(miss)        | 42(228)                | 39(229)           | 81(457)          |         |
|           | D14 (V3) | Mean(SD)       | 28.940(2.4642)         | 29.793(2.6458)    | 29.348(2.5370)   | 0.8894  |
|           |          | Median         | 28.663                 | 36.879            | 35.914           |         |
|           |          | Q1,Q3          | 16.116,56.831          | 17.176,59.664     | 17.176,57.860    |         |
|           |          | Min,Max        | 1.24,124.39            | 3.21,144.31       | 1.24,144.31      |         |
|           |          | 95%CI          | 21.85,38.33            | 21.73,40.84       | 23.89,36.06      |         |
|           | D28 (V4) | n(miss)        | 42(228)                | 39(229)           | 81(457)          |         |
|           |          | Mean(SD)       | 39.922(2.7065)         | 36.327(2.5025)    | 38.149(2.5959)   | 0.6592  |
|           |          | Median         | 38.680                 | 36.209            | 38.223           |         |
|           |          | Q1,Q3          | 18.172,77.549          | 24.032,56.987     | 18.386,73.903    |         |
|           |          | Min,Max        | 6.84,953.69            | 5.49,297.20       | 5.49,953.69      |         |
|           | D84 (V5) | 95%CI          | 29.27,54.45            | 26.98,48.91       | 30.89,47.11      |         |
|           |          | n(miss)        | 42(228)                | 39(229)           | 81(457)          |         |
|           |          | Mean(SD)       | 42.832(3.4894)         | 26.371(2.4583)    | 33.912(3.0509)   | 0.0475  |
|           |          | Median         | 39.256                 | 27.368            | 34.387           |         |
|           |          | Q1,Q3          | 19.819,100.032         | 14.179,47.959     | 16.422,56.614    |         |
| D14 (V3)  | Min,Max  | 1.55,1046.75   | 2.98,162.66            | 1.55,1046.75      |                  |         |
|           | 95%CI    | 29.02,63.23    | 19.70,35.30            | 26.50,43.40       |                  |         |
|           | n(miss)  | 42(228)        | 39(229)                | 81(457)           |                  |         |
|           | Mean(SD) | 28.994(2.5703) | 24.106(2.5547)         | 26.528(2.5595)    | 0.3804           |         |
|           | Median   | 24.461         | 24.211                 | 24.211            |                  |         |
| D28 (V4)  | Q1,Q3    | 15.256,55.457  | 13.082,61.006          | 14.280,55.457     |                  |         |
|           | Min,Max  | 4.15,217.34    | 4.84,173.97            | 4.15,217.34       |                  |         |
|           | 95%CI    | 21.61,38.91    | 17.79,32.67            | 21.55,32.66       |                  |         |
|           | n(miss)  | 42(228)        | 39(229)                | 81(457)           |                  |         |
|           | Mean(SD) | 37.358(2.5629) | 40.687(2.5607)         | 38.926(2.5493)    | 0.6844           |         |
| BA.5      | D0 (V1)  | Median         | 33.114                 | 51.512            | 44.781           |         |

| Assay    | Visit    |                | Ad5-nCov-IH<br>(N=270) | BNT-162B<br>(N=268) | Total<br>(N=538) | P-value |
|----------|----------|----------------|------------------------|---------------------|------------------|---------|
| BF.7     | D14 (V3) | Q1,Q3          | 23.521,76.823          | 21.714,78.959       | 22.666,76.823    | 0.7038  |
|          |          | Min,Max        | 1.53,207.09            | 4.67,209.27         | 1.53,209.27      |         |
|          |          | 95%CI          | 27.86,50.09            | 30.00,55.19         | 31.65,47.87      |         |
|          |          | n(miss)        | 42(228)                | 39(229)             | 81(457)          |         |
|          |          | Mean(SD)       | 51.512(2.7991)         | 47.473(2.4205)      | 49.526(2.6038)   |         |
|          |          | Median         | 45.434                 | 44.311              | 44.441           |         |
|          |          | Q1,Q3          | 23.334,103.591         | 32.174,80.105       | 26.966,98.245    |         |
|          |          | Min,Max        | 8.65,1250.99           | 7.53,361.85         | 7.53,1250.99     |         |
|          |          | 95%CI          | 37.38,70.99            | 35.65,63.23         | 40.08,61.20      |         |
|          |          | n(miss)        | 42(228)                | 39(229)             | 81(457)          |         |
|          | D28 (V4) | Mean(SD)       | 55.203(3.4659)         | 36.442(2.2933)      | 45.198(2.9395)   | 0.0793  |
|          |          | Median         | 55.823                 | 37.002              | 42.095           |         |
|          |          | Q1,Q3          | 24.101,132.480         | 19.794,63.656       | 22.970,67.171    |         |
|          |          | Min,Max        | 1.94,1198.62           | 5.11,196.28         | 1.94,1198.62     |         |
|          |          | 95%CI          | 37.48,81.32            | 27.85,47.69         | 35.61,57.37      |         |
|          |          | n(miss)        | 42(228)                | 39(229)             | 81(457)          |         |
|          |          | Mean(SD)       | 37.885(2.5453)         | 33.445(2.3707)      | 35.678(2.4530)   |         |
|          |          | Median         | 31.794                 | 31.137              | 31.673           |         |
|          |          | Q1,Q3          | 18.886,82.204          | 18.280,76.487       | 18.886,76.487    |         |
|          |          | Min,Max        | 6.14,256.50            | 7.83,194.07         | 6.14,256.50      |         |
|          | D84 (V5) | 95%CI          | 28.32,50.69            | 25.28,44.24         | 29.26,43.51      | 0.5356  |
|          |          | n(miss)        | 42(228)                | 39(229)             | 81(457)          |         |
|          |          | Mean(SD)       | 25.380(2.4528)         | 27.515(2.6231)      | 26.386(2.5223)   |         |
|          |          | Median         | 23.844                 | 33.157              | 30.346           |         |
|          |          | Q1,Q3          | 14.063,52.333          | 13.852,59.271       | 14.063,53.546    |         |
|          |          | Min,Max        | 1.19,109.41            | 2.78,129.96         | 1.19,129.96      |         |
|          |          | 95%CI          | 19.19,33.57            | 20.13,37.61         | 21.50,32.38      |         |
|          |          | n(miss)        | 42(228)                | 39(229)             | 81(457)          |         |
|          |          | Mean(SD)       | 36.431(2.7408)         | 34.113(2.4772)      | 35.296(2.5999)   |         |
|          |          | Median         | 34.650                 | 33.025              | 34.042           |         |
|          | D0 (V1)  | Q1,Q3          | 16.166,71.051          | 21.531,65.158       | 17.031,68.210    | 0.7591  |
|          |          | Min,Max        | 6.50,868.28            | 4.71,256.51         | 4.71,868.28      |         |
|          |          | 95%CI          | 26.61,49.88            | 25.42,45.78         | 28.57,43.60      |         |
|          |          | n(miss)        | 42(228)                | 39(229)             | 81(457)          |         |
|          |          | Mean(SD)       | 39.579(3.3851)         | 25.617(2.4131)      | 32.099(2.9611)   |         |
|          |          | Median         | 34.769                 | 25.017              | 29.645           |         |
|          |          | Q1,Q3          | 20.672,94.679          | 14.689,43.586       | 16.305,53.873    |         |
|          |          | Min,Max        | 1.70,940.85            | 2.75,155.31         | 1.70,940.85      |         |
|          |          | 95%CI          | 27.07,57.88            | 19.25,34.08         | 25.25,40.81      |         |
|          |          | n(miss)        | 42(228)                | 39(229)             | 81(457)          |         |
| D14 (V3) | Mean(SD) | 26.035(2.5957) | 22.568(2.5856)         | 24.304(2.5825)      | 0.5017           |         |
|          | Median   | 21.205         | 21.314                 | 21.314              |                  |         |
|          | Q1,Q3    | 13.460,56.313  | 13.023,53.026          | 13.212,53.026       |                  |         |
|          | Min,Max  | 4.25,213.08    | 4.97,152.79            | 4.25,213.08         |                  |         |
|          | 95%CI    | 19.34,35.05    | 16.59,30.71            | 19.70,29.98         |                  |         |
|          | n(miss)  | 42(228)        | 39(229)                | 81(457)             |                  |         |
|          | Mean(SD) | 24.610(2.5068) | 27.240(2.7286)         | 25.843(2.6015)      |                  |         |
|          | Median   | 25.105         | 33.195                 | 32.940              |                  |         |
|          | Q1,Q3    | 12.239,50.238  | 12.627,49.816          | 12.627,49.816       |                  |         |
|          | Min,Max  | 1.19,135.69    | 2.75,185.36            | 1.19,185.36         |                  |         |
| D28 (V4) | 95%CI    | 18.48,32.77    | 19.67,37.72            | 20.92,31.93         | 0.6359           |         |
|          | n(miss)  | 42(228)        | 39(229)                | 81(457)             |                  |         |
|          | Mean(SD) | 24.610(2.5068) | 27.240(2.7286)         | 25.843(2.6015)      |                  |         |
|          | Median   | 25.105         | 33.195                 | 32.940              |                  |         |
|          | Q1,Q3    | 12.239,50.238  | 12.627,49.816          | 12.627,49.816       |                  |         |
|          | Min,Max  | 1.19,135.69    | 2.75,185.36            | 1.19,185.36         |                  |         |
|          | 95%CI    | 18.48,32.77    | 19.67,37.72            | 20.92,31.93         |                  |         |
|          | n(miss)  | 42(228)        | 39(229)                | 81(457)             |                  |         |
|          | Mean(SD) | 24.610(2.5068) | 27.240(2.7286)         | 25.843(2.6015)      |                  |         |
|          | Median   | 25.105         | 33.195                 | 32.940              |                  |         |
| D84 (V5) | Q1,Q3    | 12.239,50.238  | 12.627,49.816          | 12.627,49.816       | 0.6359           |         |
|          | Min,Max  | 1.19,135.69    | 2.75,185.36            | 1.19,185.36         |                  |         |
|          | 95%CI    | 18.48,32.77    | 19.67,37.72            | 20.92,31.93         |                  |         |
|          | n(miss)  | 42(228)        | 39(229)                | 81(457)             |                  |         |
|          | Mean(SD) | 24.610(2.5068) | 27.240(2.7286)         | 25.843(2.6015)      |                  |         |
|          | Median   | 25.105         | 33.195                 | 32.940              |                  |         |
|          | Q1,Q3    | 12.239,50.238  | 12.627,49.816          | 12.627,49.816       |                  |         |
|          | Min,Max  | 1.19,135.69    | 2.75,185.36            | 1.19,185.36         |                  |         |
|          | 95%CI    | 18.48,32.77    | 19.67,37.72            | 20.92,31.93         |                  |         |
|          | n(miss)  | 42(228)        | 39(229)                | 81(457)             |                  |         |

| Assay    | Visit    |                | Ad5-nCov-IH<br>(N=270) | BNT-162B<br>(N=268) | Total<br>(N=538) | P-value |
|----------|----------|----------------|------------------------|---------------------|------------------|---------|
| BQ.1.1   | D14 (V3) | n(miss)        | 42(228)                | 39(229)             | 81(457)          | 0.7763  |
|          |          | Mean(SD)       | 33.952(2.7786)         | 31.906(2.5454)      | 32.951(2.6515)   |         |
|          |          | Median         | 28.264                 | 27.800              | 28.076           |         |
|          |          | Q1,Q3          | 16.040,76.101          | 17.107,54.868       | 16.590,71.537    |         |
|          |          | Min,Max        | 4.65,474.77            | 5.03,301.75         | 4.65,474.77      |         |
|          | D28 (V4) | n(miss)        | 42(228)                | 39(229)             | 81(457)          | 0.0647  |
|          |          | Mean(SD)       | 38.086(3.4724)         | 24.379(2.4017)      | 30.724(3.0030)   |         |
|          |          | Median         | 37.463                 | 25.525              | 29.448           |         |
|          |          | Q1,Q3          | 17.482,92.773          | 12.839,45.203       | 15.026,52.977    |         |
|          |          | Min,Max        | 1.57,1025.50           | 3.42,146.05         | 1.57,1025.50     |         |
|          | D84 (V5) | n(miss)        | 42(228)                | 39(229)             | 81(457)          | 0.4204  |
|          |          | Mean(SD)       | 26.567(2.6300)         | 22.343(2.5988)      | 24.442(2.6096)   |         |
|          |          | Median         | 21.957                 | 20.851              | 21.146           |         |
|          |          | Q1,Q3          | 13.614,51.484          | 12.597,47.536       | 12.778,47.536    |         |
|          |          | Min,Max        | 3.61,195.07            | 4.02,184.51         | 3.61,195.07      |         |
|          | D0 (V1)  | n(miss)        | 42(228)                | 39(229)             | 81(457)          | 0.7251  |
|          |          | Mean(SD)       | 24.197(2.5209)         | 26.113(2.7703)      | 25.101(2.6269)   |         |
|          |          | Median         | 26.590                 | 32.618              | 30.788           |         |
|          |          | Q1,Q3          | 12.826,48.621          | 10.983,47.951       | 12.826,48.166    |         |
|          |          | Min,Max        | 1.02,132.58            | 3.03,192.29         | 1.02,192.29      |         |
| D14 (V3) | n(miss)  | 42(228)        | 39(229)                | 81(457)             | 0.5833           |         |
|          | Mean(SD) | 33.749(2.6071) | 30.011(2.6077)         | 31.894(2.5965)      |                  |         |
|          | Median   | 32.608         | 28.109                 | 31.242              |                  |         |
|          | Q1,Q3    | 17.256,68.571  | 17.387,51.235          | 17.387,64.926       |                  |         |
|          | Min,Max  | 5.02,317.65    | 4.20,323.76            | 4.20,323.76         |                  |         |
| D28 (V4) | n(miss)  | 42(228)        | 39(229)                | 81(457)             | 0.0578           |         |
|          | Mean(SD) | 36.009(3.4987) | 22.673(2.4328)         | 28.819(3.0361)      |                  |         |
|          | Median   | 36.197         | 23.833                 | 25.505              |                  |         |
|          | Q1,Q3    | 17.067,89.953  | 11.883,43.392          | 15.142,50.677       |                  |         |
|          | Min,Max  | 1.55,895.93    | 3.52,131.56            | 1.55,895.93         |                  |         |
| D84 (V5) | n(miss)  | 42(228)        | 39(229)                | 81(457)             | 0.3054           |         |
|          | Mean(SD) | 25.355(2.5495) | 20.428(2.5810)         | 22.850(2.5656)      |                  |         |
|          | Median   | 21.972         | 20.528                 | 21.188              |                  |         |
|          | Q1,Q3    | 13.424,47.446  | 11.083,44.854          | 11.708,46.257       |                  |         |
|          | Min,Max  | 3.22,176.95    | 4.00,180.44            | 3.22,180.44         |                  |         |
| WT       | D0 (V1)  | n(miss)        | 42(228)                | 39(229)             | 81(457)          | 0.6729  |
|          |          | Mean(SD)       | 47.572(2.6991)         | 52.113(2.5582)      | 49.707(2.6183)   |         |
|          |          | Median         | 48.248                 | 54.157              | 48.694           |         |
|          |          | Q1,Q3          | 27.576,97.461          | 27.921,105.838      | 27.921,99.238    |         |
|          |          | Min,Max        | 1.28,275.54            | 4.13,299.50         | 1.28,299.50      |         |
|          | D14 (V3) | n(miss)        | 42(228)                | 39(229)             | 81(457)          | 0.8657  |
|          |          | Mean(SD)       | 69.550(2.7424)         | 72.042(2.3220)      | 70.739(2.5265)   |         |
|          |          | Median         | 62.023                 | 76.202              | 67.146           |         |

| Assay    | Visit          |                | Ad5-nCov-IH<br>(N=270) | BNT-162B<br>(N=268) | Total<br>(N=538) | P-value |        |
|----------|----------------|----------------|------------------------|---------------------|------------------|---------|--------|
| XBB.1    | D28 (V4)       | Q1,Q3          | 31.596,130.523         | 48.198,118.389      | 38.368,122.523   | 0.1818  |        |
|          |                | Min,Max        | 10.05,2108.69          | 9.60,350.55         | 9.60,2108.69     |         |        |
|          |                | 95%CI          | 50.79,95.24            | 54.83,94.66         | 57.63,86.83      |         |        |
|          |                | n(miss)        | 42(228)                | 39(229)             | 81(457)          |         |        |
|          |                | Mean(SD)       | 74.294(3.5207)         | 54.413(2.1809)      | 63.949(2.8886)   |         |        |
|          |                | Median         | 59.563                 | 55.861              | 55.861           |         |        |
|          |                | Q1,Q3          | 34.399,195.152         | 27.325,92.118       | 33.743,120.484   |         |        |
|          |                | Min,Max        | 2.05,1519.44           | 4.62,225.06         | 2.05,1519.44     |         |        |
|          | D84 (V5)       | 95%CI          | 50.19,109.98           | 42.26,70.06         | 50.58,80.85      | 0.7722  |        |
|          |                | n(miss)        | 42(228)                | 39(229)             | 81(457)          |         |        |
|          |                | Mean(SD)       | 48.889(2.6064)         | 46.162(2.2391)      | 47.556(2.4183)   |         |        |
|          |                | Median         | 43.581                 | 46.007              | 45.307           |         |        |
|          |                | Q1,Q3          | 28.321,87.837          | 26.056,92.324       | 26.898,87.837    |         |        |
|          |                | Min,Max        | 7.08,388.50            | 9.11,187.44         | 7.08,388.50      |         |        |
|          |                | 95%CI          | 36.27,65.90            | 35.55,59.95         | 39.12,57.81      |         |        |
|          |                | n(miss)        | 42(228)                | 39(229)             | 81(457)          |         |        |
|          | D0 (V1)        | Mean(SD)       | 18.069(2.5176)         | 21.389(2.6056)      | 19.598(2.5547)   | 0.4221  |        |
|          |                | Median         | 18.087                 | 23.640              | 21.125           |         |        |
|          |                | Q1,Q3          | 9.616,34.952           | 8.951,48.450        | 9.616,39.319     |         |        |
|          |                | Min,Max        | 1.03,117.19            | 2.59,96.60          | 1.03,117.19      |         |        |
|          |                | 95%CI          | 13.55,24.09            | 15.68,29.18         | 15.93,24.11      |         |        |
|          |                | n(miss)        | 42(228)                | 39(229)             | 81(457)          |         |        |
|          |                | Mean(SD)       | 24.274(2.9028)         | 23.427(2.4804)      | 23.863(2.6834)   |         | 0.8727 |
|          |                | Median         | 20.516                 | 21.362              | 20.993           |         |        |
|          | Q1,Q3          | 10.676,62.997  | 12.620,39.221          | 12.620,44.066       |                  |         |        |
|          | Min,Max        | 4.31,234.98    | 3.75,188.34            | 3.75,234.98         |                  |         |        |
|          | 95%CI          | 17.41,33.84    | 17.45,31.45            | 19.18,29.68         |                  |         |        |
|          | n(miss)        | 42(228)        | 39(229)                | 81(457)             |                  |         |        |
| Mean(SD) | 26.396(3.8088) | 17.993(2.3746) | 21.948(3.1396)         | 0.1275              |                  |         |        |
| Median   | 21.728         | 18.607         | 20.222                 |                     |                  |         |        |
| Q1,Q3    | 11.072,53.493  | 9.322,31.627   | 10.147,43.690          |                     |                  |         |        |
| Min,Max  | 1.06,1751.20   | 2.62,137.53    | 1.06,1751.20           |                     |                  |         |        |
| 95%CI    | 17.40,40.04    | 13.59,23.82    | 17.04,28.27            |                     |                  |         |        |
| n(miss)  | 42(228)        | 39(229)        | 81(457)                |                     |                  |         |        |
| Mean(SD) | 17.479(2.9258) | 16.100(2.5616) | 16.801(2.7355)         |                     | 0.7160           |         |        |
| Median   | 13.564         | 15.335         | 13.593                 |                     |                  |         |        |
| Q1,Q3    | 8.211,40.937   | 7.577,32.554   | 7.940,32.643           |                     |                  |         |        |
| Min,Max  | 3.18,150.26    | 3.00,99.74     | 3.00,150.26            |                     |                  |         |        |
| 95%CI    | 12.51,24.42    | 11.87,21.84    | 13.45,20.99            |                     |                  |         |        |

98 Note: 'N' is the number of subjects in each data set. n(%) is the actual number of subjects observed and the  
99 corresponding percentage. Comparing between groups used the Chi-square test or Fisher's exact test. SCR  
100 was defined as 2-fold increase from baseline.



101 Supplementary Table 11: Analysis of GMI of saliva samples SIgA antibodies (PPS)

|                |           |            | <b>Ad5-nCov-IH</b> | <b>BNT-1M</b>  | <b>Total</b>   | <b>P value</b> |
|----------------|-----------|------------|--------------------|----------------|----------------|----------------|
|                |           |            | <b>(N=270)</b>     | <b>(N=268)</b> | <b>(N=538)</b> |                |
| Assay          | Visit     |            |                    |                |                | <i>P value</i> |
| B.1.1.529-BA.1 | D14 (V3)  | n(miss)    | 42(228)            | 39(229)        | 81(457)        |                |
|                |           | Mean (SD)  | 1.37(2.96)         | 1.22(2.46)     | 1.30(2.70)     | 0.5879         |
|                |           | Median     | 1.16               | 1.18           | 1.18           |                |
|                |           | Q1, Q3     | 0.73,1.88          | 0.75,2.32      | 0.75,2.12      |                |
|                |           | Min, Max   | 0.21,191.30        | 0.14,10.39     | 0.14,191.30    |                |
|                | 95% CI    | 0.98,1.93  | 0.91,1.63          | 1.04,1.61      |                |                |
|                | D28 (V4)  | n(miss)    | 42(228)            | 39(229)        | 81(457)        |                |
|                |           | Mean (SD)  | 1.45(3.48)         | 0.90(2.37)     | 1.15(3.00)     | 0.0504         |
|                |           | Median     | 1.04               | 1.06           | 1.06           |                |
|                |           | Q1, Q3     | 0.83,1.91          | 0.44,1.54      | 0.66,1.57      |                |
|                |           | Min, Max   | 0.98,2.13          | 0.68,1.19      | 0.90,1.47      |                |
|                | 95% CI    | 0.98,2.13  | 0.68,1.19          | 0.90,1.47      |                |                |
|                | D84 (V5)  | n(miss)    | 42(228)            | 39(229)        | 81(457)        |                |
|                |           | Mean (SD)  | 1.02(3.08)         | 0.78 (2.40)    | 0.90(2.76)     | 0.2483         |
|                |           | Median     | 0.87               | 0.78           | 0.87           |                |
| Q1, Q3         |           | 0.42,1.64  | 0.49,1.20          | 0.46,1.35      |                |                |
| Min, Max       |           | 0.24,62.54 | 0.09,9.30          | 0.90,62.54     |                |                |
| 95% CI         | 0.72,1.44 | 0.59,1.04  | 0.72,1.12          |                |                |                |
| BA.2.75        | D14 (V3)  | n(miss)    | 42(228)            | 39(229)        | 81(457)        |                |
|                |           | Mean (SD)  | 1.41(2.98)         | 1.25(2.63)     | 1.33(2.80)     | 0.5932         |
|                |           | Median     | 1.08               | 1.40           | 1.27           |                |
|                |           | Q1, Q3     | 0.72,1.96          | 0.80,2.55      | 0.79,2.16      |                |
|                |           | Min, Max   | 0.26,209.46        | 0.10,7.64      | 0.10,209.46    |                |
|                | 95% CI    | 1.00,1.98  | 0.19,1.71          | 1.06,1.67      |                |                |
|                | D28 (V4)  | n(miss)    | 42(228)            | 39(229)        | 81(457)        |                |
|                |           | Mean (SD)  | 1.56(3.40)         | 0.93(2.45)     | 1.22(3.01)     | 0.0353         |
|                |           | Median     | 1.13               | 1.05           | 1.05           |                |
|                |           | Q1, Q3     | 0.88,1.93          | 0.52,1.90      | 0.70,1.91      |                |
|                |           | Min, Max   | 0.11,326.32        | 0.11,4.90      | 0.11,326.32    |                |
|                | 95% CI    | 1.06,2.28  | 0.70,1.24          | 0.95,1.55      |                |                |
|                | D84 (V5)  | n(miss)    | 42(228)            | 39(229)        | 81(457)        |                |
|                |           | Mean (SD)  | 0.99(2.92)         | 0.78(2.57)     | 0.88(2.75)     | 0.2831         |
|                |           | Median     | 0.86               | 0.73           | 0.85           |                |
| Q1, Q3         |           | 0.50,1.47  | 0.46,1.34          | 0.48,1.38      |                |                |
| Min, Max       |           | 0.19,63.25 | 0.07,16.44         | 0.07,63.25     |                |                |
| 95% CI         | 0.71,1.38 | 0.57,1.05  | 0.70,1.10          |                |                |                |
| BA.2.75.2      | D14 (V3)  | n(miss)    | 42(228)            | 39(229)        | 81(457)        |                |
|                |           | Mean (SD)  | 1.35(2.85)         | 1.18(2.52)     | 1.27(2.68)     | 0.5320         |
|                |           | Median     | 1.17               | 1.36           | 1.23           |                |
|                |           | Q1, Q3     | 0.71,1.89          | 0.80,2.28      | 0.74,2.057     |                |
|                |           | Min, Max   | 0.46,215.95        | 0.08,5.89      | 0.08,215.95    |                |
|                | 95% CI    | 0.98,1.87  | 0.87,1.59          | 1.02,1.57      |                |                |
|                | D28 (V4)  | n(miss)    | 42(228)            | 39(229)        | 81(457)        |                |
|                |           | Mean (SD)  | 1.45(3.45)         | 0.89(2.52)     | 1.14(3.06)     | 0.0481         |
|                |           | Median     | 1.07               | 0.97           | 0.97           |                |
|                |           | Q1, Q3     | 0.80,1.95          | 0.56,1.69      | 0.71,1.72      |                |
|                |           | Min, Max   | 0.10,415.52        | 0.09,5.53      | 0.09,415.52    |                |
|                | 95% CI    |            |                    |                |                |                |

|          |           | <b>Ad5-nCov-IH</b> | <b>BNT-1M</b>  | <b>Total</b>   | <b>P value</b> |        |
|----------|-----------|--------------------|----------------|----------------|----------------|--------|
|          |           | <b>(N=270)</b>     | <b>(N=268)</b> | <b>(N=538)</b> |                |        |
| BA.4.6   | D84 (V5)  | 95% CI             | 0.98,2.12      | 0.66,1.19      | 0.89,1.46      | 0.5287 |
|          |           | n(miss)            | 42(228)        | 39(229)        | 81(457)        |        |
|          |           | Mean (SD)          | 0.93(2.99)     | 0.80 (2.63)    | 0.87(2.80)     |        |
|          |           | Median             | 0.80           | 0.89           | 0.81           |        |
|          |           | Q1, Q3             | 0.49,1.39      | 0.42,1.54      | 0.45,1.421     |        |
|          | D14 (V3)  | Min, Max           | 0.22,62.79     | 0.06,16.17     | 0.06,62.79     | 0.5978 |
|          |           | 95% CI             | 0.66,1.31      | 0.59,1.10      | 0.69,1.09      |        |
|          |           | n(miss)            | 42(228)        | 39(229)        | 81(457)        |        |
|          |           | Mean (SD)          | 1.38(3.06)     | 1.22(2.63)     | 1.30(2.84)     |        |
|          |           | Median             | 1.16           | 1.44           | 1.23           |        |
|          | D28 (V4)  | Q1, Q3             | 0.68,2.19      | 0.86,2.10      | 0.74,2.10      | 0.0399 |
|          |           | Min, Max           | 0.30,225.45    | 0.09,7.22      | 0.09,225.45    |        |
|          |           | 95% CI             | 0.97,1.95      | 0.89,1.67      | 1.03,1.64      |        |
|          |           | n(miss)            | 42(228)        | 39(229)        | 81(457)        |        |
|          |           | Mean (SD)          | 1.48(3.66)     | 0.89(2.44)     | 1.16(3.14)     |        |
| BA.5     | D84 (V5)  | Median             | 1.00           | 1.02           | 1.00           | 0.3712 |
|          |           | Q1, Q3             | 0.78,1.99      | 0.50,1.90      | 0.70,1.94      |        |
|          |           | Min, Max           | 0.14,480.18    | 0.10,3.81      | 0.10, 480.18   |        |
|          |           | 95% CI             | 0.99,2.22      | 0.66,1.18      | 0.90,1.49      |        |
|          |           | n(miss)            | 42(228)        | 39(229)        | 81(457)        |        |
|          | D14 (V3)  | Mean (SD)          | 1.00(3.07)     | 0.81(2.74)     | 0.90(2.91)     | 0.4618 |
|          |           | Median             | 0.82           | 0.90           | 0.82           |        |
|          |           | Q1, Q3             | 0.41,1.74      | 0.46,1.49      | 0.46,1.54      |        |
|          |           | Min, Max           | 0.22,63.07     | 0.07,22.91     | 0.07, 63.07    |        |
|          |           | 95% CI             | 0.71,1.42      | 0.58,1.12      | 0.71,1.14      |        |
|          | D28 (V4)  | n(miss)            | 42(228)        | 39(229)        | 81(457)        | 0.0370 |
|          |           | Mean (SD)          | 1.38(2.98)     | 1.17(2.53)     | 1.27(2.75)     |        |
|          |           | Median             | 1.14           | 1.36           | 1.25           |        |
|          |           | Q1, Q3             | 0.71,2.18      | 0.77,2.10      | 0.73,2.10      |        |
|          |           | Min, Max           | 0.34,210.27    | 0.10,5.66      | 0.10, 210.27   |        |
| D84 (V5) | 95% CI    | 0.98,1.94          | 0.86,1.58      | 1.02,1.59      | 0.0370         |        |
|          | n(miss)   | 42(228)            | 39(229)        | 81(457)        |                |        |
|          | Mean (SD) | 1.478(3.4798)      | 0.90(2.34)     | 1.16(2.99)     |                |        |
|          | Median    | 1.063              | 1.05           | 1.05           |                |        |
|          | Q1, Q3    | 0.80,2.01          | 0.53,1.69      | 0.69,1.85      |                |        |
| BF.7     | D14 (V3)  | Min, Max           | 0.12,424.61    | 0.12,3.59      | 0.12,424.61    | 0.5282 |
|          |           | 95% CI             | 1.00,2.18      | 0.68,1.18      | 0.91,1.48      |        |
|          |           | n(miss)            | 42(228)        | 39(229)        | 81(457)        |        |
|          |           | Mean (SD)          | 1.01(2.92)     | 0.82(2.60)     | 0.92(2.77)     |        |
|          |           | Median             | 0.86           | 0.89           | 0.89           |        |
|          | D28 (V4)  | Q1, Q3             | 0.47,1.51      | 0.51,1.48      | 0.48,1.49      | 0.0326 |
|          |           | Min, Max           | 0.24,64.07     | 0.07,19.89     | 0.07,64.07     |        |
|          |           | 95% CI             | 0.71,1.42      | 0.60,1.12      | 0.73,1.15      |        |
|          |           | n(miss)            | 42(228)        | 39(229)        | 81(457)        |        |
|          |           | Mean (SD)          | 1.44(2.99)     | 1.24(2.66)     | 1.34(2.82)     |        |
|          | D84 (V5)  | Median             | 1.20           | 1.48           | 1.24           | 0.0326 |
|          |           | Q1, Q3             | 0.71,2.12      | 0.86,2.11      | 0.83,2.11      |        |
|          |           | Min, Max           | 0.27,214.27    | 0.08,7.17      | 0.08,214.27    |        |
|          |           | 95% CI             | 1.02,2.02      | 0.90,1.70      | 1.06,1.68      |        |
|          |           | n(miss)            | 42(228)        | 39(229)        | 81(457)        |        |
|          |           | Mean (SD)          | 1.56(3.44)     | 0.93(2.41)     | 1.22(3.01)     |        |

|        |          | <b>Ad5-nCov-IH</b> | <b>BNT-1M</b>  | <b>Total</b>   | <b>P value</b> |
|--------|----------|--------------------|----------------|----------------|----------------|
|        |          | <b>(N=270)</b>     | <b>(N=268)</b> | <b>(N=538)</b> |                |
|        |          | Median             | 1.13           | 1.05           |                |
|        |          | Q1, Q3             | 0.81,2.10      | 0.56,1.81      |                |
|        |          | Min, Max           | 0.14,398.23    | 0.10,3.52      |                |
|        |          | 95% CI             | 1.06,2.29      | 0.70,1.24      |                |
|        | D84 (V5) | n(miss)            | 42(228)        | 39(229)        |                |
|        |          | Mean (SD)          | 1.03(2.99)     | 0.82(2.65)     | 0.92(2.83)     |
|        |          | Median             | 0.93           | 0.83           | 0.83           |
|        |          | Q1, Q3             | 0.53,1.60      | 0.50,1.51      | 0.50,1.51      |
|        |          | Min, Max           | 0.21,63.84     | 0.06,21.25     | 0.06,63.84     |
|        |          | 95% CI             | 0.73,1.44      | 0.60,1.13      | 0.73,1.16      |
| BQ.1   | D14 (V3) | n(miss)            | 42(228)        | 39(229)        | 81(457)        |
|        |          | Mean (SD)          | 1.38(3.04)     | 1.17(2.66)     | 1.28(2.85)     |
|        |          | Median             | 1.12           | 1.27           | 1.23           |
|        |          | Q1, Q3             | 0.66,2.06      | 0.84,2.21      | 0.68,2.18      |
|        |          | Min, Max           | 0.29,205.08    | 0.08,6.93      | 0.08,205.08    |
|        |          | 95% CI             | 0.98,1.95      | 0.85,1.61      | 1.01,1.61      |
|        | D28 (V4) | n(miss)            | 42(228)        | 39(229)        | 81(457)        |
|        |          | Mean (SD)          | 1.55(3.51)     | 0.90(2.42)     | 1.19(3.06)     |
|        |          | Median             | 1.15           | 1.04           | 1.12           |
|        |          | Q1, Q3             | 0.80,2.00      | 0.55,1.77      | 0.72,1.85      |
|        |          | Min, Max           | 0.14,484.81    | 0.11,3.39      | 0.11,484.81    |
|        |          | 95% CI             | 1.05,2.29      | 0.67,1.19      | 0.93,1.52      |
|        | D84 (V5) | n(miss)            | 42(228)        | 39(229)        | 81(457)        |
|        |          | Mean (SD)          | 1.08 (2.96)    | 0.82(2.78)     | 0.95(2.88)     |
|        |          | Median             | 1.08           | 0.90           | 0.95           |
|        |          | Q1, Q3             | 0.42,1.76      | 0.53,1.43      | 0.53,1.49      |
|        |          | Min, Max           | 0.22,64.17     | 0.06,21.64     | 0.06,64.17     |
|        |          | 95% CI             | 0.77,1.51      | 0.59,1.14      | 0.75,1.19      |
| BQ.1.1 | D14 (V3) | n(miss)            | 42(228)        | 39(229)        | 81(457)        |
|        |          | Mean (SD)          | 1.40(2.95)     | 1.15(2.72)     | 1.27 (2.83)    |
|        |          | Median             | 1.11           | 1.29           | 1.22           |
|        |          | Q1, Q3             | 0.69,2.17      | 0.84,2.07      | 0.72,2.07      |
|        |          | Min, Max           | 0.32,218.10    | 0.07,6.34      | 0.07,218.10    |
|        |          | 95% CI             | 1.00,1.95      | 0.83,1.59      | 1.01,1.60      |
|        | D28 (V4) | n(miss)            | 42(228)        | 39(229)        | 81(457)        |
|        |          | Mean (SD)          | 1.49(3.66)     | 0.87(2.48)     | 1.15(3.17)     |
|        |          | Median             | 1.08           | 1.05           | 1.06           |
|        |          | Q1, Q3             | 0.81,1.96      | 0.53,1.72      | 0.67,1.85      |
|        |          | Min, Max           | 0.16,757.11    | 0.09,3.90      | 0.09,757.11    |
|        |          | 95% CI             | 0.99,2.23      | 0.65,1.17      | 0.89,1.48      |
|        | D84 (V5) | n(miss)            | 42(228)        | 39(229)        | 81(457)        |
|        |          | Mean (SD)          | 1.05(2.95)     | 0.78(2.78)     | 0.91(2.88)     |
|        |          | Median             | 0.97           | 0.80           | 0.88           |
|        |          | Q1, Q3             | 0.41,1.65      | 0.52,1.38      | 0.51,1.54      |
|        |          | Min, Max           | 0.22,65.57     | 0.06,23.31     | 0.06,65.57     |
|        |          | 95% CI             | 0.75,1.47      | 0.56,1.09      | 0.72,1.15      |
| WT     | D14 (V3) | n(miss)            | 42(228)        | 39(229)        | 81(457)        |
|        |          | Mean (SD)          | 1.46(2.88)     | 1.38(2.45)     | 1.42 (2.66)    |
|        |          | Median             | 1.16           | 1.75           | 1.44           |
|        |          | Q1, Q3             | 0.74,2.09      | 0.72,2.23      | 0.74,2.11      |
|        |          | Min, Max           | 0.30,214.64    | 0.11,8.81      | 0.11,214.64    |

|          |           | <b>Ad5-nCov-IH</b> | <b>BNT-IM</b>  | <b>Total</b>   | <b>P value</b> |        |
|----------|-----------|--------------------|----------------|----------------|----------------|--------|
|          |           | <b>(N=270)</b>     | <b>(N=268)</b> | <b>(N=538)</b> |                |        |
| XBB.1    | D28 (V4)  | 95% CI             | 1.05,2.03      | 1.03,1.85      | 1.15,1.77      | 0.0760 |
|          |           | n(miss)            | 42(228)        | 39(229)        | 81(457)        |        |
|          |           | Mean (SD)          | 1.56(3.30)     | 1.04(2.21)     | 1.29(2.81)     |        |
|          |           | Median             | 1.11           | 1.12           | 1.12           |        |
|          |           | Q1, Q3             | 0.88,2.25      | 0.65,1.71      | 0.80,1.97      |        |
|          |           | Min, Max           | 0.13,337.27    | 0.14,5.56      | 0.13,337.27    |        |
|          | D84 (V5)  | 95% CI             | 1.08,2.27      | 0.81,1.35      | 1.02,1.62      | 0.4964 |
|          |           | n(miss)            | 42(228)        | 39(229)        | 81(457)        |        |
|          |           | Mean (SD)          | 1.03(2.95)     | 0.89(2.35)     | 0.96(2.65)     |        |
|          |           | Median             | 1.00           | 0.95           | 0.96           |        |
|          |           | Q1, Q3             | 0.44,1.52      | 0.54,1.29      | 0.50,1.49      |        |
|          |           | Min, Max           | 0.21,60.31     | 0.09,10.75     | 0.09,60.31     |        |
| D14 (V3) | 95% CI    | 0.73,1.44          | 0.67,1.17      | 0.77,1.19      | 0.3911         |        |
|          | n(miss)   | 42(228)            | 39(229)        | 81(457)        |                |        |
|          | Mean (SD) | 1.34(2.96)         | 1.10(2.83)     | 1.22(2.90)     |                |        |
|          | Median    | 1.06               | 1.53           | 1.21           |                |        |
|          | Q1, Q3    | 0.69,1.83          | 0.59,2.10      | 0.69,2.01      |                |        |
|          | Min, Max  | 0.42,227.76        | 0.06,7.22      | 0.06,227.76    |                |        |
| D28 (V4) | 95% CI    | 0.96,1.88          | 0.78,1.54      | 0.96,1.54      | 0.0319         |        |
|          | n(miss)   | 42(228)            | 39(229)        | 81(457)        |                |        |
|          | Mean (SD) | 1.46(3.58)         | 0.84(2.62)     | 1.12(3.20)     |                |        |
|          | Median    | 0.95               | 1.04           | 1.03           |                |        |
|          | Q1, Q3    | 0.75,1.83          | 0.49,1.66      | 0.69,1.78      |                |        |
|          | Min, Max  | 0.14,442.33        | 0.10,5.68      | 0.10,442.33    |                |        |
| D84 (V5) | 95% CI    | 0.98,2.17          | 0.62,1.15      | 0.87,1.45      | 0.3038         |        |
|          | n(miss)   | 42(228)            | 39(229)        | 81(457)        |                |        |
|          | Mean (SD) | 0.97(2.98)         | 0.75(2.97)     | 0.86(2.98)     |                |        |
|          | Median    | 0.78               | 0.78           | 0.78           |                |        |
|          | Q1, Q3    | 0.47,1.35          | 0.41,1.36      | 0.43,1.35      |                |        |
|          | Min, Max  | 0.21,62.09         | 0.04,15.76     | 0.04,62.09     |                |        |
|          | 95% CI    | 0.69,1.36          | 0.53,1.07      | 0.67,1.09      |                |        |

102 N=number of subjects in each data set, n=actual number of subjects in each row, Ad5-nCov-  
103 IH=Recombinant Covid-19 Vaccine (Adenovirus Type 5 Vector) For Inhalation, BNT-IM=  
104 intramuscular tozinameran vaccine.

105 The antibody concentration of each subject was log transformed before statistical description.  
106 Chi-square test or Fisher's exact test was used for inter-group comparison.

107  
108

Supplementary Table 12: Summary of solicited and unsolicited AEs emerged in the 0 to 28 Days post booster vaccination by preferred term (PT) (SS)

|                             | Ad5-nCov-IH<br>(N=270) |     | BNT-162b1<br>(N=269) |      | Total<br>(N=539) |      | P value |
|-----------------------------|------------------------|-----|----------------------|------|------------------|------|---------|
|                             | n(%)                   | e   | n(%)                 | e    | n(%)             | e    | P value |
| OVERALL                     | 127(47.04)             | 816 | 189(70.26)           | 1169 | 316(58.63)       | 1985 | <0.0001 |
| Grade 3 or higher AE        | 9(3.33)                | 20  | 13(4.83)             | 21   | 22(4.08)         | 41   | 0.3791  |
| Solicited AE                | 126(46.67)             | 806 | 189(70.26)           | 1157 | 315(58.44)       | 1963 | <0.0001 |
| Grade 3 or higher AE        | 9(3.33)                | 20  | 13(4.83)             | 21   | 22(4.08)         | 41   | 0.3791  |
| Local AE                    |                        |     |                      |      |                  |      |         |
| Vaccination site erythema   | 0                      | 0   | 4(1.49)              | 4    | 4(0.74)          | 4    | 0.1312  |
| Vaccination site induration | 0                      | 0   | 4(1.49)              | 4    | 4(0.74)          | 4    | 0.1312  |
| Vaccination site pain       | 1(0.37)                | 1   | 169(62.83)           | 174  | 170(31.54)       | 175  | <0.0001 |
| Vaccination site pruritus   | 0                      | 0   | 14(5.20)             | 15   | 14(2.60)         | 15   | 0.0001  |
| Vaccination site rash       | 0                      | 0   | 1(0.37)              | 1    | 1(0.19)          | 1    | 0.4991  |
| Vaccination site swelling   | 0                      | 0   | 13(4.83)             | 13   | 13(2.41)         | 13   | 0.0003  |
| Oropharyngeal pain          | 54(20.00)              | 64  | 37(13.75)            | 54   | 91(16.88)        | 118  | 0.0530  |
| Pharyngeal swelling         | 18(6.67)               | 19  | 9(3.35)              | 10   | 27(5.01)         | 29   | 0.0772  |
| Dysphonia                   | 33(12.22)              | 34  | 21(7.81)             | 28   | 54(10.02)        | 62   | 0.0878  |
| Dry mouth                   | 31(11.48)              | 33  | 22(8.18)             | 30   | 53(9.83)         | 63   | 0.1979  |
| Stomatitis                  | 16(5.93)               | 18  | 6(2.23)              | 6    | 22(4.08)         | 24   | 0.0302  |
| Systemic AE                 |                        |     |                      |      |                  |      |         |
| Constipation                | 6(2.22)                | 7   | 10(3.72)             | 15   | 16(2.97)         | 22   | 0.3064  |
| Diarrhoea                   | 17(6.30)               | 20  | 22(8.18)             | 23   | 39(7.24)         | 43   | 0.3991  |
| Dysphagia                   | 20(7.41)               | 24  | 13(4.83)             | 14   | 33(6.12)         | 38   | 0.2125  |
| Nausea                      | 19(7.04)               | 20  | 12(4.46)             | 17   | 31(5.75)         | 37   | 0.1990  |
| Vomiting                    | 10(3.70)               | 11  | 4(1.49)              | 4    | 14(2.60)         | 15   | 0.1057  |
| Chest pain                  | 18(6.67)               | 18  | 19(7.06)             | 22   | 37(6.86)         | 40   | 0.8555  |
| Fatigue                     | 60(22.22)              | 69  | 83(30.86)            | 100  | 143(26.53)       | 169  | 0.0232  |
| Pain                        | 9(3.33)                | 9   | 30(11.15)            | 31   | 39(7.24)         | 40   | 0.0005  |
| Pyrexia                     | 24(8.89)               | 31  | 25(9.29)             | 30   | 49(9.09)         | 61   | 0.8702  |
| Hypersensitivity            | 3(1.11)                | 3   | 4(1.49)              | 4    | 7(1.30)          | 7    | 0.9961  |
| Decreased appetite          | 14(5.19)               | 15  | 17(6.32)             | 22   | 31(5.75)         | 37   | 0.5716  |
| Arthralgia                  | 13(4.81)               | 15  | 19(7.06)             | 26   | 32(5.94)         | 41   | 0.2694  |
| Arthritis                   | 7(2.59)                | 10  | 11(4.09)             | 12   | 18(3.34)         | 22   | 0.3336  |
| Myalgia                     | 44(16.30)              | 51  | 94(34.94)            | 109  | 138(25.60)       | 160  | <0.0001 |
| Headache                    | 71(26.30)              | 89  | 92(34.20)            | 116  | 163(30.24)       | 205  | 0.0457  |
| Syncope                     | 1(0.37)                | 1   | 1(0.37)              | 1    | 2(0.37)          | 2    | 1.0000  |
| Anxiety                     | 12(4.44)               | 12  | 8(2.97)              | 10   | 20(3.71)         | 22   | 0.3665  |
| Depression                  | 12(4.44)               | 12  | 8(2.97)              | 10   | 20(3.71)         | 22   | 0.3665  |
| Insomnia                    | 18(6.67)               | 20  | 36(13.38)            | 40   | 54(10.02)        | 60   | 0.0094  |
| Mental disorder             | 7(2.59)                | 7   | 7(2.60)              | 9    | 14(2.60)         | 16   | 0.9944  |
| Bronchospasm                | 4(1.48)                | 4   | 3(1.12)              | 3    | 7(1.30)          | 7    | 1.0000  |
| Cough                       | 54(20.00)              | 62  | 44(16.36)            | 55   | 98(18.18)        | 117  | 0.2729  |
| Dyspnoea                    | 12(4.44)               | 13  | 10(3.72)             | 14   | 22(4.08)         | 27   | 0.6697  |
| Rhinorrhoea                 | 46(17.04)              | 55  | 48(17.84)            | 64   | 94(17.44)        | 119  | 0.8050  |
| Sneezing                    | 43(15.93)              | 49  | 39(14.50)            | 52   | 82(15.21)        | 101  | 0.6445  |
| Mucocutaneous disorder      | 2(0.74)                | 2   | 2(0.74)              | 2    | 4(0.74)          | 4    | 1.0000  |
| Pruritus                    | 8(2.96)                | 8   | 12(4.46)             | 13   | 20(3.71)         | 21   | 0.3576  |
| Unsolicited AE              | 9(3.33)                | 10  | 7(2.60)              | 12   | 16(2.97)         | 22   | 0.6170  |
| Lymphadenopathy             | 0                      | 0   | 1(0.37)              | 1    | 1(0.19)          | 1    | 0.4991  |
| Swelling of eyelid          | 1(0.37)                | 1   | 0                    | 0    | 1(0.19)          | 1    | 1.0000  |

|                      |         |   |         |   |         |   |        |
|----------------------|---------|---|---------|---|---------|---|--------|
| Abdominal pain       | 0       | 0 | 1(0.37) | 1 | 1(0.19) | 1 | 0.4991 |
| Flatulence           | 1(0.37) | 1 | 0       | 0 | 1(0.19) | 1 | 1.0000 |
| Chills               | 0       | 0 | 2(0.74) | 2 | 2(0.37) | 2 | 0.2486 |
| Feeling cold         | 0       | 0 | 1(0.37) | 1 | 1(0.19) | 1 | 0.4991 |
| Conjunctivitis       | 1(0.37) | 1 | 0       | 0 | 1(0.19) | 1 | 1.0000 |
| Ligament sprain      | 1(0.37) | 1 | 0       | 0 | 1(0.19) | 1 | 1.0000 |
| Pain in extremity    | 0       | 0 | 1(0.37) | 1 | 1(0.19) | 1 | 0.4991 |
| Dizziness            | 4(1.48) | 4 | 1(0.37) | 1 | 5(0.93) | 5 | 0.3711 |
| Hypoaesthesia        | 0       | 0 | 1(0.37) | 1 | 1(0.19) | 1 | 0.4991 |
| Confusional state    | 0       | 0 | 1(0.37) | 1 | 1(0.19) | 1 | 0.4991 |
| Menstruation delayed | 1(0.37) | 1 | 1(0.37) | 1 | 2(0.37) | 2 | 1.0000 |
| Dry throat           | 0       | 0 | 1(0.37) | 1 | 1(0.19) | 1 | 0.4991 |
| Yellow skin          | 1(0.37) | 1 | 0       | 0 | 1(0.19) | 1 | 1.0000 |
| Peripheral coldness  | 0       | 0 | 1(0.37) | 1 | 1(0.19) | 1 | 0.4991 |

109 N=number of subjects in each data set, n=actual number of subjects observed and the corresponding  
110 percentage, e=number of adverse events in the specified category, AE=adverse event, Ad5-nCov-IH=  
111 Recombinant Covid-19 Vaccine (Adenovirus Type 5 Vector) For Inhalation, BNT-IM= intramuscular  
112 tozinameran vaccine.

113 Supplementary Table 13: Severity analysis of SAEs (SS)

|                                                  |          | Ad5-nCov-IH<br>(N=270) |   | BNT-IM<br>(N=269) |    | Total<br>(N=539) |    | P<br>value |
|--------------------------------------------------|----------|------------------------|---|-------------------|----|------------------|----|------------|
| Serious adverse event (Solicited or Unsolicited) |          | n(%)                   | e | n(%)              | e  | n(%)             | e  | P<br>value |
| SAE                                              |          | 5(1.85)                | 5 | 8(2.97)           | 10 | 13(2.41)         | 15 | 0.3959     |
|                                                  | Mild     | 0                      | 0 | 0                 | 0  | 0                | 0  |            |
|                                                  | Moderate | 2(0.74)                | 2 | 4(1.49)           | 5  | 6(1.11)          | 7  | 0.6781     |
|                                                  | Severe   | 3(1.11)                | 3 | 4(1.49)           | 5  | 7(1.30)          | 8  | 0.9961     |
| Unsolicited                                      |          | 5(1.85)                | 5 | 8(2.97)           | 10 | 13(2.41)         | 15 | 0.3959     |
|                                                  | Mild     | 0                      | 0 | 0                 | 0  | 0                | 0  |            |
|                                                  | Moderate | 2(0.74)                | 2 | 4(1.49)           | 5  | 6(1.11)          | 7  | 0.6781     |
|                                                  | Severe   | 3(1.11)                | 3 | 4(1.49)           | 5  | 7(1.30)          | 8  | 0.9961     |

114 N=number of subjects in each data set, n=actual number of subjects observed and the corresponding  
 115 percentage, e=number of adverse events in the specified category, SAE=serious adverse event, Ad5-nCov-  
 116 IH= Recombinant Covid-19 Vaccine (Adenovirus Type 5 Vector) For Inhalation, BNT-IM= intramuscular  
 117 tozinameran vaccine.

118 In addition to the adverse event, if the subject has more than one repeated adverse event, the most severe  
 119 grade will be taken. Chi-square test or Fisher's exact test was used for inter-group comparison.

120 Supplementary Table 14: Summary of SAEs by system organ class and preferred term (PT) (SS)

|                                                 | Ad5-nCov-IH |   | BNT-IM  |    | Total    |    | P       |
|-------------------------------------------------|-------------|---|---------|----|----------|----|---------|
|                                                 | (N=270)     |   | (N=269) |    | (N=539)  |    | value   |
| Serious adverse event (SOC)                     | n(%)        | e | n(%)    | e  | n(%)     | e  | P value |
| SAE                                             | 5(1.85)     | 5 | 8(2.97) | 10 | 13(2.41) | 15 | 0.3959  |
| Cardiac Disorders                               | 1(0.37)     | 1 | 2(0.74) | 2  | 3(0.56)  | 3  | 0.9974  |
| Acute myocardial infarction                     | 0           | 0 | 2(0.74) | 2  | 2(0.37)  | 2  | 0.2486  |
| Myocardial infarction                           | 1(0.37)     | 1 | 0       | 0  | 1(0.19)  | 1  | 1.0000  |
| Infections and infestations                     | 3(1.11)     | 3 | 3(1.12) | 3  | 6(1.11)  | 6  | 1.0000  |
| COVID-19                                        | 1(0.37)     | 1 | 0       | 0  | 1(0.19)  | 1  | 1.0000  |
| Dengue fever                                    | 0           | 0 | 3(1.12) | 3  | 3(0.56)  | 3  | 0.2456  |
| Pneumonia                                       | 1(0.37)     | 1 | 0       | 0  | 1(0.19)  | 1  | 1.0000  |
| Urinary tract infection                         | 1(0.37)     | 1 | 0       | 0  | 1(0.19)  | 1  | 1.0000  |
| Metabolism and nutrition disorders              | 1(0.37)     | 1 | 0       | 0  | 1(0.19)  | 1  | 1.0000  |
| Dehydration                                     | 1(0.37)     | 1 | 0       | 0  | 1(0.19)  | 1  | 1.0000  |
| Musculoskeletal and connective tissue disorders | 0           | 0 | 1(0.37) | 1  | 1(0.19)  | 1  | 0.4991  |
| Musculoskeletal pain                            | 0           | 0 | 1(0.37) | 1  | 1(0.19)  | 1  | 0.4991  |
| Nervous system disorders                        | 0           | 0 | 1(0.37) | 1  | 1(0.19)  | 1  | 0.4991  |
| Epilepsy                                        | 0           | 0 | 1(0.37) | 1  | 1(0.19)  | 1  | 0.4991  |
| Renal and urinary disorders                     | 0           | 0 | 1(0.37) | 1  | 1(0.19)  | 1  | 0.4991  |
| End stage renal disease                         | 0           | 0 | 1(0.37) | 1  | 1(0.19)  | 1  | 0.4991  |
| Vascular disorders                              | 0           | 0 | 2(0.74) | 2  | 2(0.37)  | 2  | 0.2486  |
| Hypertension                                    | 0           | 0 | 2(0.74) | 2  | 2(0.37)  | 2  | 0.2486  |

121 N=number of subjects in each data set, n=actual number of subjects observed and the corresponding  
122 percentage, e=number of adverse events in the specified category, SAE=serious adverse event, SOC=system  
123 organ class, Ad5-nCov-IH=Recombinant Covid-19 Vaccine (Adenovirus Type 5 Vector) For Inhalation,  
124 BNT-IM= intramuscular tozinameran vaccine.

125 In addition to the incidence of adverse event, each row will be counted only once for one subject in each  
126 experimental group. Chi-square test or Fisher's exact test was used for inter-group comparison.



127 Supplementary Table 15: Stratified analysis of the efficacy of recombinant COVID-19 vaccine  
 128 (Ad5-nCoV-IH) in preventing virologically confirmed COVID-19 cases

|                                       | <b>Ad5-nCoV-IH</b><br>N=270 | <b>BNT-IM</b><br>N=269 | <b>VE (95% CI)</b> | <b>aVE (95% CI)</b> |
|---------------------------------------|-----------------------------|------------------------|--------------------|---------------------|
| 60 median follow-up days              | 22/270                      | 26/269                 | 0.17(-0.46-0.53)   | 0.19(-0.43-0.55)    |
| Has infection history                 | 10/145                      | 15/139                 | 0.38(-0.38-0.72)   | 0.31(-0.57-0.7)     |
| No infection history                  | 12/125                      | 11/130                 | -0.14(-1.58-0.5)   | -0.22(-1.89-0.48)   |
| mRNA+mRNA+X                           | 8/106                       | 12/113                 | 0.33(-0.63-0.73)   | 0.38(-0.56-0.75)    |
| ICV+ICV+X                             | 6/88                        | 8/98                   | 0.11(-1.56-0.69)   | 0.04(-1.88-0.68)    |
| AZ+AZ+X                               | 8/69                        | 6/50                   | 0.09(-1.61-0.69)   | -0.06(-2.13-0.64)   |
| 90 median follow-up days              | 26/270                      | 31/269                 | 0.18(-0.38-0.51)   | 0.2(-0.35-0.53)     |
| Has infection history                 | 13/145                      | 18/139                 | 0.33(-0.37-0.67)   | 0.32(-0.42-0.67)    |
| No infection history                  | 13/125                      | 13/130                 | -0.03(-1.22-0.52)  | -0.07(-1.39-0.52)   |
| mRNA+mRNA+X                           | 10/106                      | 14/113                 | 0.27(-0.65-0.67)   | 0.33(-0.53-0.71)    |
| ICV+ICV+X                             | 7/88                        | 10/98                  | 0.22(-1.05-0.7)    | 0.16(-1.3-0.69)     |
| AZ+AZ+X                               | 9/69                        | 7/50                   | 0.13(-1.34-0.68)   | 0(-1.74-0.64)       |
| 120 median follow-up days             | 27/270                      | 33/269                 | 0.2(-0.32-0.52)    | 0.22(-0.3-0.53)     |
| Has infection history                 | 14/145                      | 20/139                 | 0.35(-0.29-0.67)   | 0.34(-0.34-0.67)    |
| No infection history                  | 13/125                      | 13/130                 | -0.02(-1.21-0.53)  | -0.06(-1.36-0.52)   |
| mRNA+mRNA+X                           | 10/106                      | 14/113                 | 0.26(-0.66-0.67)   | 0.33(-0.53-0.71)    |
| ICV+ICV+X                             | 7/88                        | 12/98                  | 0.36(-0.64-0.75)   | 0.28(-0.9-0.73)     |
| AZ+AZ+X                               | 10/69                       | 7/50                   | 0.03(-1.54-0.63)   | -0.1(-1.96-0.59)    |
| 169 median follow-up days (full time) | 34/270                      | 35/269                 | 0.06(-0.51-0.41)   | 0.07(-0.49-0.42)    |
| Has infection history                 | 20/145                      | 21/139                 | 0.13(-0.61-0.53)   | 0.12(-0.64-0.53)    |
| No infection history                  | 14/125                      | 14/130                 | -0.02(-1.15-0.51)  | -0.11(-1.38-0.49)   |
| mRNA+mRNA+X                           | 14/106                      | 15/113                 | 0.04(-1-0.53)      | 0.1(-0.89-0.57)     |
| ICV+ICV+X                             | 8/88                        | 13/98                  | 0.32(-0.63-0.72)   | 0.29(-0.78-0.71)    |
| AZ+AZ+X                               | 11/69                       | 7/50                   | -0.06(-1.74,0.59)  | -0.12(-1.96-0.57)   |

129 *N* number of participants in each data set, *n* actual number of COVID-19 cases, *mRNA* tozinameran  
 130 vaccine, *X* first booster dose of any vaccine, *ICV* COVID-19 Vaccine (Vero Cell), Inactivated, *AZ* COVID-  
 131 19 Vaccine ChAdOx1-S Recombinant, *Ad5-nCoV-IH* Recombinant Covid-19 Vaccine (Adenovirus Type 5  
 132 Vector) for Inhalation, *BNT-IM* intramuscular tozinameran vaccine, *VE* vaccine efficacy, *aVE* adjusted  
 133 vaccine efficacy.

| <b>Randomisation ID</b> | <b>Group</b> | <b>Lineage</b> | <b>Randomisation ID</b> | <b>Group</b> | <b>Lineage</b> |
|-------------------------|--------------|----------------|-------------------------|--------------|----------------|
| A001-003                | BNT-IM       | BN.1           | A001-031                | Ad5-nCoV-IH  | XBL            |
| A001-009                | BNT-IM       | BN.1.2         | A001-044                | Ad5-nCoV-IH  | XBB.1          |
| A001-012                | BNT-IM       | XBB.1          | A001-049                | Ad5-nCoV-IH  | XBB.1          |
| A001-023                | BNT-IM       | BE.1           | A001-097                | Ad5-nCoV-IH  | XBB.1          |
| A001-058                | BNT-IM       | BQ.1.1         | A001-101                | Ad5-nCoV-IH  | BM.1.1.3       |
| A001-064                | BNT-IM       | XBB.1          | A001-105                | Ad5-nCoV-IH  | BA.2.10.1      |
| A001-066                | BNT-IM       | BA.2.10.1      | A003-008                | Ad5-nCoV-IH  | XBB.1.2        |
| A001-103                | BNT-IM       | BN.1.3         | A003-010                | Ad5-nCoV-IH  | XBB.1.1        |
| A003-022                | BNT-IM       | XBB.1.2        | A003-021                | Ad5-nCoV-IH  | Unassigned     |
| A003-023                | BNT-IM       | Unassigned     | A004-019                | Ad5-nCoV-IH  | BA.2.10.1      |
| A003-061                | BNT-IM       | BN.1.3         | A004-026                | Ad5-nCoV-IH  | XBB            |
| A004-056                | BNT-IM       | BA.5.2         | A004-050                | Ad5-nCoV-IH  | XBB            |
| A004-061                | BNT-IM       | BA.5.2         | A004-053                | Ad5-nCoV-IH  | BA.2.10.1      |
| A004-069                | BNT-IM       | BA.2           | A004-065                | Ad5-nCoV-IH  | Unassigned     |
| A004-078                | BNT-IM       | XBB.1          | A004-076                | Ad5-nCoV-IH  | BQ.1.1         |
| A004-082                | BNT-IM       | Unassigned     | A004-085                | Ad5-nCoV-IH  | XBB            |
| A004-090                | BNT-IM       | XBB.1          | A004-087                | Ad5-nCoV-IH  | XBB            |
| A004-115                | BNT-IM       | XBB.1.9.1      | A004-091                | Ad5-nCoV-IH  | XBB.1          |
| A004-171                | BNT-IM       | BQ.1.1         | A004-096                | Ad5-nCoV-IH  | Unassigned     |
| A004-188                | BNT-IM       | BM.1.1         | A004-113                | Ad5-nCoV-IH  | XBB.1          |
| A004-215                | BNT-IM       | XBB.3          | A004-114                | Ad5-nCoV-IH  | XBB.1.9.1      |
| A004-219                | BNT-IM       | XBB.1          | A004-172                | Ad5-nCoV-IH  | XBB.1.9.1      |
| A004-238                | BNT-IM       | Unassigned     | A004-173                | Ad5-nCoV-IH  | XBB.1          |
| A004-262                | BNT-IM       | XBB.1.9.1      | A004-200                | Ad5-nCoV-IH  | CQ.2           |
| A004-266                | BNT-IM       | XBB.1          | A004-208                | Ad5-nCoV-IH  | BN.1.2         |
| A004-272                | BNT-IM       | BN.1.1         | A004-225                | Ad5-nCoV-IH  | XBB.1.9.1      |
| A004-276                | BNT-IM       | XBB.1          | A004-282                | Ad5-nCoV-IH  | Unassigned     |
| A004-290                | BNT-IM       | Unassigned     | A004-292                | Ad5-nCoV-IH  | XBB.1.9.1      |
| A004-328                | BNT-IM       | CH.1.1.1       | A004-314                | Ad5-nCoV-IH  | XBB.1.16       |
| A004-336                | BNT-IM       | CH.1.1.1       | A004-317                | Ad5-nCoV-IH  | XBB.1          |

|          |        |          |          |             |          |
|----------|--------|----------|----------|-------------|----------|
| A004-349 | BNT-IM | XBB.1    | A004-323 | Ad5-nCoV-IH | XBB      |
| A001-004 | BNT-IM | BN.1.3   | A004-108 | Ad5-nCoV-IH | NA       |
| A001-043 | BNT-IM | XBB.1    | A004-289 | Ad5-nCoV-IH | NA       |
| A004-016 | BNT-IM | RTK only | A004-046 | Ad5-nCoV-IH | RTK only |
| A004-168 | BNT-IM | RTK only |          |             |          |

135 Ad5-nCoV-IH= Recombinant COVID-19 Vaccine (Adenovirus Type 5 Vector) for Inhalation, BNT-IM=  
136 intramuscular tozinameran vaccine.

137 All 69 endpoint cases from 14 days (excluding Day 14) after the second booster vaccination were confirm  
138 by both RT-PCR and RTK (64 cases) or RTK only (3 cases). NA indicates the collected sample not  
139 available for sequencing.
